# Supplementary material for: Expression of A New Endogenous Retrovirus-Associated Transcript in Hodgkin Lymphoma Cells
Source: PubMed Central journal article supplement (PMC6862598; doi:10.3390/ijms20215320), 2019-10-25
Supplement: ijms-20-05320-s001.pdf [file ijms-20-05320-s001.pdf]

### Supplementary Material for:

Schneider et al. 2019, Expression of a new endogenous retrovirus-associated transcript in Hodgkin lymphoma cells

#### Content:

|                                                                                                                                              |                |
|----------------------------------------------------------------------------------------------------------------------------------------------|----------------|
| <b>1. Genomic reference sequence of human chromosome 1 including THOLE and CSF1</b>                                                          | <b>Page 2</b>  |
| <b>2. RepeatMasker results for the sequence of human chromosome 1 including THOLE and CSF1</b>                                               | <b>Page 7</b>  |
| <b>3. RepeatMasker alignments from the THOLE locus as discussed in the manuscript</b>                                                        | <b>Page 11</b> |
| <b>4. Supplementary Figure 1. Comparison of the THOLE associated LTR8 from Hodgkin lymphoma cell lines and the reference genome sequence</b> | <b>Page 23</b> |
| <b>5. Supplementary Figure 2. Absence of THOLE expression in EBV immortalized cells</b>                                                      | <b>Page 24</b> |
| <b>6. Supplementary Figure 3. Conservation of the THOLE associated ERV in Hominoidea</b>                                                     | <b>Page 25</b> |
| <b>7. Supplementary Figure 4. Conservation of the CSF1 locus in mammals</b>                                                                  | <b>Page 26</b> |
| <b>8. Supplementary Figure 5. Moderate expression of THOLE in embryonic carcinoma cells NTERA-2</b>                                          | <b>Page 27</b> |
| <b>9. Supplementary Figure 6. Schematic representation of the THOLE/CSF1 region with primer locations</b>                                    | <b>Page 28</b> |

# 1. Genomic reference sequence of human chromosome 1 including THOLE and CSF1 (NC\_000001 REGION: 109831234..109931057)

**Legend:** LTR8, Alu repeat, HUERS-P1 internal region, THOLE exon, LTR7B, L2 repeat, LINC01768 exon 4-5, CSF1 exon

## Notes:

1. Only repeats discussed in the manuscript are highlighted.
2. The first two shown CSF1 exons are used alternatively. The first exon is only used by the predicted variant XM\_017000369. The two last exons are also used alternatively. The penultimate CSF1 exon is used only by transcript variant 4. Transcript variants 1 and 2 use the last exon. Transcript variants 2 and 3 use shortened versions of the 7th exon.

CAATCACATATTCATGAAATAATGTCAGGTTTTAAAACTTTTATCAAATCAACAGAGCATTTAAATGCAAT TGA  
AACCGCCTTTGCAAATTATGACTGAGACAGTGAAAGAGATCTAACCTTACTGACTCCATCTTGCTTCTAGCCTC  
AAAGCTGCCCTTGTAGGCTGGGTGTACGCTGAACTAATTTGGGGGAAACTTAGTATTATAGTTTAAATAAAGATG  
GTAACAGCCCTTTCCCAAAGCAGGCCTCCTTCTTGCCTGGGGACTAGATTGCCTTTGTAGGACTAACATTACCTG  
CAAGATTAGAAATTATGGTTTAGGAGTCATGCAGCTGGAGACTTCAAGATTCCGATCCTCCCTAAACTGCTCCTA  
AGATCATTGCTTGAGATATTTTGTAGACCCTGCGCTTGATGAATCAGCTGGCACCACCAGATCAGTAACTGGT  
TCATCTGATCTTGTAGCCCCACCCAGGAAGTACTGACTCAGTGAAGAAGACAGGTCGACTCCCTATTA TTTCTTT  
CTTTCTTTCTTTTTTTTTTTTTTTTGTAGACAGGGTCTCACACTGTTGGCCAGGCTGGAGTGCAGTGGTGCATCTTG  
GCTCACTGCAACCTCCACCTCCATATTCAAGCGATTCTCCTGCCTCAGCCTCCCAGTAGCTGGGATTACAGGTG  
GCTGCCACCACGCCCCGCTAAGTTTTATTATTTTTAATAAAGATGGGGTTTCACTATGTTGGCCAGGCTGGTCTT  
GAACTCCTGACCTCGTGATCCACCTGCCTCAGCCTCCCAAAGTGCTGGGATTATAGGTGTGGCCACTGCACCTG  
GCC TGTAAATTCATCTCTGACCAATCAGCACTCCTGGCTCACTGGCTTCCCCTCACCCACCAAGTTATCCTTAA  
AACTCTGCTCCCTGAATGCTCAGGGAGACTGATTTGAGTAATAATAAACTCCCGTCTGCAGCACAGCAGCTCTG  
CATGAATTACTCTTTCAGTGTGCAATTCCTGTCTCAATGAATCAGCTCTGTCTAGGCAGCGGGCAAGGTGAA  
CCCCTTGGGCGGTTACAAATTTGGGGGCTCGTCTGGGATTGCCCTTGTGGCTACTTGCCCATGGTTCAGTGGCCT  
CCTCCCCCAGCGATGAATCCAGAAGTCAGCCCAAGCGGCAGCCTGGTTCTCTTGGACTGGGGCTGACTCTGGTA  
TTTCTCTACTGGCAGGGCACTGCCGACCCGATGTGCATGGATTTAATTGCAGTGGAGAAAGAGTCTTAGGGAGAC  
ACCACTTAATTGTAGCCCTATCACAGGGCGTCTGTCTGTAGCCCCATGGTGGGATGTCTGTAGCCCCATTGTGGG  
CTGTCTGGATTGGTAAGTATCCTAGGCAGTCCCAATGGCTTCTTCTCTCTGACTGGTTATGTAGCCCTATGG  
TGGTGTGTCTGTAGCACCATTGCAGGGTGTCTGTTTCAAGCTCCTGTGGGGTCTCAGTTGGCTCTTTCTAACTAGT  
CACACAGCTCCGAAGGTCTAATAGGAAGAGTCTGGTTTGGGAGACTTGTCTTCAATCAGGAAGATTTGAGGAG  
TTTTCTCAGAAGGAGACTAGGAGAATAGTTTGGGAGGGATACTCTTGGAGTTCTTGGTTAGGGATCTGATTTAGA  
AGGCCTTCTGTCTTTGCATGTGTTTCGTATATTTGGAAGGAATCTCAGAGAGGTTGCTGATGGAAGTCCAGCAGGC  
CTAACTCAGAGAACCCTCCTTATTTGTCTGGTCACATTCGATGAGCTCTAAAGAAGGCTCAACAGGCCTGTCTCA  
GGGGGTGAATATCTGCTCTTCCATTGCTCAGATACCCCGTTGTGAATTACCATTTGGAGGTAGTCCGTCCCCAC  
CTGGAGTGGATCAAAGACAACAGAGGCCAACGGGGAAAAAGTTTGTAGCTTTGCCAGGCTGATATTGGCTGCTGAA  
TAAGGTGACTAATGTCTGTTTTGTTATGTGTATTTTGTCTGGGATGGAAAATGTTAATTTGGTTTCCCATGCAGCC  
CGTCAGGCAGCATCTTGCAAATAAAGAATCTTGTCTTACAGGGTGAATTTCTCTTGTAAAATGGCTTGAACCCCA  
AAGCTATAGCACAAGCAAGCAGGGTCATCAGAAGCCACTCCATTCTTCTGGAAGCTGCAGGGAAATGGAACCCAG  
AAACCAGGTATGACAGCAAAAAGGGTAAAAAATCTTACCAGGCAAGTTTCTGATCTGTCTTGCTTTCTCTGTCT  
GAATAAACGGTAAACTATTTGTCTCCTCTGCAAGGGTTGATTAACAGAAAAAGGATTTGTGAGACTAGTCTTA  
AGCTGTAAAAATCTGGTGTGCTTTGTGCTAAGAATTTGTCTTTCTGTGTTCTGTAATGGAGAGAGGGGTATCACA  
GGATAGAACATGGGTTTAGGACCCCTAAGCCTGCTTTTAAAGTCAGCTTGGCAGGCTGGTTCAGTTATAAACTTTG  
CTATGGGTCCCTGAAACCAATACGGTATGAAATTTCTCTGTTTTGTTTTGTGTCTTAAAGAGTTTAAACCTTATGA  
CCATGGGAGATACTTTCTTTTGGTTTCTACCACCCAGACGACAGGAATTTTGGGGTTCATGTCATAATCCTAA TT

TTTTTTTTTTTTTTTTTTTTGAGATGGAGTCTTGCTCCCATTACGAGGGCTGGAGTGCAGTGGTGCAATCTCAGCT  
GAATGCAACCTCTGCCTCCCGGGGATTTCCCTTCCCTCAGCCTCCCCAGCAGCTGGGATTACAATTTTTGTATTTT  
TAGTAGAGACAGTGTTCACCATGTTGGCCAGGCCGGTATCGAACTCCTGACCTCAAGTGATCCACCCGCCTCAG  
CCTCCCAAAGTGCTAGGATTACAGACAGGCGTGAGCCACTGTGCCAGCC TAAAAATTTTTCTTGAGCAATTAAA  
AGCCTTGCAAGCTTGAAATTGGCTTCTCTAGGCTCCTTCTGGGAAAAAGCAATAGGAACTTCTCAATGCTGTATAG  
CTCGGTAGCTAAGGCTTTATCTTTTGACACTGGTGGCCTGGGTTCAATTGTTGGCTGCTGAAATGATTCATTTCT  
GGTTTGTATTTGTGTAACGTTGCCATTTATTGAGGTTTTTTCCCATCGTAGATAGCTTCTGATTTCCCTCTCTTG  
AATTTCCCTTTCTCTGAACTACCTTGTGGAGATTCTAAATCTTATAAAAAAAGAACTGCTTACCATGTCTTTG  
AAGCACCTAGGAGGTTACATTTGGTAAAGTTTACAAGCTAGAAGTATTGGCCACTTGGCATGGCTAAAAGTCAGGT  
AATAAGAGATTTGAAAAGATTTCTTTTTTAAAGAGCACTATGGTTAAAAGTTAGGTTAATTTAAAAGTGATAAAC  
AAGCTATAGATGTATTTAAAAGGCCATTGTTTTTCTCTTCTTGGAACTTGTTTTTCTGGAAAAAGGTTTTTCCCTT  
CTAAGTCGACTGAACTATTTTTCTCCATTTTTTTGTCTTGCCACTCTTAATACACACATCAGAGCCCCAAGATA  
ACTTCTGGTAGCTTGGGACTCCTTGGGAAAAACAGAGGAGGTGCTGCAGACCCCCGCTTTGGGGAAAAAACC  
AACACTCTGTTTTTTCATCATGAAACCCAGGAATTAATAGCGGATAGATCCCTCTCAAAATCAAAGGCTTGTCTG  
TTTTGCATTGTGTTGTCTGACGGTTTTGAGTTTGGGGGCATCAGAAATTAATTTGCATTATGAGAGAGCTTTGG  
TGTGTAATAACTAGGTAGGAAATATACTCTAAGGGATGGCTAATAGTAGTTAGGGAGGGGTACTTGACTCTTTGC  
ACACTTGGATCAGAGAAGCATGCTCTTGGCCACCTGGAAGATAAGGAGACATCCCCACCCCCACTGGGAGATGA  
GACTCTCATGAGGGATGGGCTGATTGCAAAATGGGCTGATTGGCTTTGGGTTGCTTTGCAATGAAATGCAGGGTA  
GAAGCACTGCACTGTCTCTCCAGTAGTATTTCCCTCCTTTTGGGATCCAGGATCAGTATAAAATGGCACCCCTTA  
ATTTTGGGGATGTGTCTCTGCCTTCAGCTGCTTATTTGCTGCTTATTTGGCCTTAGAAATGCATGCTTTCCAGGC  
CCTGTTCCCTCCAAGGGCTCCACCCCGAAGCCAGTAATCCAATTAAGAACTGGCAAATGAAAAACCTTACAAGTG  
CCTAATCTTCTCTGTATATTTATATGTGTTGTATGTTTAGATATAAAAAGAGCTCTGATTAATTTGGCTTAGAAA  
AATAAGCGCTTAAATCAAATATTTTTGTCAGAAAAATAGAAATTTAATGCCTTTTTTTCTCGTCATTTTAGTAAT  
CTTTTGGAAATAAAGACAGTTTTAAAGATTATTGGTAAAATAAAATGTCTTGAAAAATGTAGACATTTGGTCTAAA  
TTAAGATCAGGTATCAGACTTGCTAAATATTTAAGTTCAAAGTCTTTCTTTGACTTTTAAAAATGTTTCGATTT  
ACCTACTTTGGAGCATTAGATTATAGATAAATCCTGCGGACATGGGGAGAGCCATGTCCGCTAGCTATGCTAAAA  
GGAGTCAGACCTTATCTTCATTTCTGTCTGATGTCTTAGGCTCCACCCCTAGTACATAATTTAAATCGCTTACTT  
GTCAGGTTTTTCACTAAAAATAAAAGGTGCTAAGAGTTAACATTGCAACATGTAGTCGAGACCGCTGGAGAAACA  
GTTTTACATACAAGGTGTGTAGGGAATGTGTTTTAGGTAAAAGATTATAAGAAGGCATGGGAATATGGCTTTTTGT  
TAAAGGGAATGTAATTTTTGTCTAGTTTCAAGAGGTTTTTAAAGATTGTCTTAACTTAAAGAGTAATGGAACAAAAC  
TGAAGGTTTTAAGCAAAGTGAAAAGGGTTTTGAAAAGGGTTGATCTTTGTAAACTTCTGTGGGTATAAACAAGTTGG  
CTAAGATTTAAAAGAAATTTTAGCTTTTCCCATAGGTTAAAACATTTAAATCATACTGATGTGGGGCCAGAA  
TCTGGGCCCATGTGTACGAATAACAGGGTTTTCTTAGAAAATTGATCTGCTGTTGATGGAAAAATGTAAGGGT  
TCTAAAAGTTTTATGAAAATCTTGCCCTATGGTGAACCTAATTTAAAAGTGGATAGAGATATAAAATTTTATCTAA  
AAAAGTCTTTAACGTTAAAAGATGCACTAATGCAAAACAAGAAATTTGGTTTTCTCTTTTGAAGATGATTTTTTA  
TGTAATGTTAAAAGATAATGAAAGGGTTTTGTTTTCTCCTTTGGGTAAATGGCAGGGAAAAAAGAGGAGAGAG  
ATAAGAGACAGATTGAGTTGGCCTCATGCTATCTTCATTGGGTCTTGTTTGGAAAGCTAAGTCTTCTCTATCAGA  
GTGAAGGTTTTTCTTTTTTAAAAATTTGTTTTGGAGTTATCAATTCGGCCAAATGAATGATTTACGGTGATCTGGG  
ATCTATTTTGTGATATCTGTGTTTTAAACCTTTGATATTTGACAAGCTTTCCAATATCAAATTTATAAATTTCTGT  
CTCTTTCTAACCTAATATTTTAGATATTAGGTTCTTTAAAGTCCAAAAATGACATTTGGCTTATTTGGTACAAAA  
ATCACACAGGAAGCATTGCTTGTCTCATGCGTCCATGTGAACAGACCACCAAAACAGGCTTTGTGTGAGCAACAAG  
GCTGTTTTATTTACCTGGGCGCAGGCGGTCTGAGTCTGAAAAGAGAGTCAGCGAAGGGTGGTGGGATTATCGTTA  
GTTCTTATAGGTTTTGGGATAGGCGGTGGAGTTAGGAGCAATGTTTTTCCGGCAGGGGGTGGATCTCACAAAGTA  
AGTTCTCAAGGGTGGGGAGAATTACAAAGAACCTTCCCTAAGGTGGGGGAAATTACAAAGTACGTTGATCACTTAG  
GGTGGGGCAGAAACAAATCACAATGGTGGAAATGTCATCAGTTAAGGCTATTTTCACTTCTTTTGTGGATCTTCAG  
TTGCTTCAGGCCATCTGGATGTATACGTGCAGGTACAGGGCATATGATGGCTTAGCTTGGGCTCAGAGGCCCTGA  
CATTGTCAAATATGAAATGGTGTTTGGCTTTCTTTGGTCTCTATTTGTGTAATGTGTTATTGGTATATGTTCTG  
AAGTAATGTAAACTCCTATAATTTCTAATATGACTTAGTCTATGTTATCTGTAATAATTATAATTTATTATGTTAA  
CAGACTGTGTGCTACAAAGGTAAATTTCCCTTGTCAATTGTGTCTTTAACTGTGGCTGCCCTAAAATGTTTTTGT  
ATCCACAGATAAATGCTGTCTCGTTTTGGTCTCTTTAAAAGATGGTTTTATAATCAGTTTAAAATGTAAACAGG  
TGCTCTTAAATGCAGGATTCTGATAAATAACTCTGGAGATTGTGACATTTGAATAGAGGAAAAACTTTCAAATAG  
AAGAGTGAAGGGTGTTTGGTTCACTTTGGACTGTATTTGTATAAATATATTATTAGTATGTATTTCAAATTTATG  
GGAACTTCTACAATGTTGATATAATTTAGTGTACATTGATAAATAATATTGTTATGTAAAAATGTATGCCATAGA  
AGTAATCAAATTTCTAGTCAATTGTAGCTTTAATAGGGCTTTAAAATTTGTGCTATTGGAATAGAGAAAAAAC

CAAACCTTCTAGGACTGTCATGGAGAGCTAATGTGTTAAACATTGCTAAACATTTTGTTCAGAGTCAAGGGAAC  
TTATTTCTTTAGAGGTATTTGCAACTTTTAAACAAATGAATAAGATATACTCCTGAGAACAAAATTTGGAGCATAT  
TTGTTCCCTCTCTACCTGATTTCTCCAGAATTTGGAAATTTTGTGAATATTCTCAATTTATGGCAGTATAGTTA  
ATTGTGTAAGTGCAATAAGAAGCTATTTTCTTCTGTAACAGAACACAGTTGGAGAAAAGTATTATTTTACCAAGG  
TTTTGAATGGAATGGCATGCTTCCTTTAAAGAATCAAAGTTGACTTATAGAGCCAATTAAGCCTGTTGGGGAAAT  
CTGACCTCATAACCTTGTCTGCACAGTGTCCCCGTACAAGGTTCTGACCTGTGGTAAGTAAGGAATTTCACTTTT  
TAACAGGCCCCAGGAACCCCAAGTTGTCTTGGGACCTCAAGAGGAGAGGAATTTGCCCAACTCATAGGTATTTGTC  
GGTACAAACCCACAGCTGGGCTTGGCTTTTAAAAAGTCTTATCTGAGATTCTTCATGGAACAGAGTTCTATCAA  
GCCAATTAATAAAGTCTACATGAAAAATAATTATTCTTGTCTGACTTTTTACAAATAATTAGGCCAATTACAGTA  
AGACTAAAGTTTATTTTGTAAACGAATCAGTTCTATCATGATTTGTTTTTAAAAAATGAAGACTGGAGAGAGAA  
AATTTATGCTTCAAAGAAAACTATAGTACACTGTTGTTAGCTATTCTTGAGGTTTTTTTTCTGTAGTTTAGACT  
AAATTCCAAATTTCTTTGTGGGCTAGAAGTCCCAAACCTAATGCTTTCAAATCTTTGTTTTTAAAAATGGGAATG  
TACTCCTCAGCCTAGGACTCATTATTTACCTTATAATAGGCTGTTTCACTTAAACACTGTAGTAAAATATAGTT  
GAGAGTACTAATGTTTTTGGCATGAAAGCCAGCCAGGCTGCATGAGTCACTCAGACAGTTACAAAGCAGTTCA  
ACTCTTCTCACCTTGGGATGCACTCCCATTTCCACTACGTCTCTGTTGGCAGGAAGAAGCCAGAGCGATTTACA  
ACCTTTTCCCATCTTCATAGCCTACATCGTAAGACGAGGGCATTATAAAACCCAAAGGGAAAGGATTTGAAACTGCC  
TTTGCAATATTATGACTGAGACAGTGAAAGAGATCTAAGTATACTGACTCCATCTTGTTCCTAACCTCCAAGCTG  
TCCTTGTAGGCTGGGCATAGACTGAACTAACTTTGGGAAAAAAGCTTAGTTTATAGTTTAAACAAAGATGGTAACA  
GCCCTTTCCCAAAGCAGGCTCCTTCTTGCATGGGAAGTACTGCTTTGTAGGACTAACATTAGCTGCAAGAT  
TAGAAATTATGGTTTAGGAGTCATGCAGCTGGAGGCTACAAGATTCTGAGCCTCCCTAAATAGCTTCCAAGATCA  
GAGCTTGAGATATTTTGCAGACCCTGCACTTAATGGATCAGCTGGCACCCTAAGATCAATAAACTGGCTCATCT  
GATCTTGTGACTCCCACCCAGGAAGTCACTCAGTGAAGAAGACAGGTCGACTCCCTATGATTTTCATCTCTGAC  
CAATCAGCACTCCTGGCTCACTGGCTTAGTTATCTTTAAAAACTCTGCTCCCCAAATGCTCAGGGGAGACTGATTT  
GAGTAATAATAAAACTCTGGTCTCCACATAGCTGGCTCTGCGTGAATTACTCTTTCTCTATTGCAATTCACCTG  
TCTTGATGAATCGGCTCTGTCTAGGCAGCAGGCAAAGCAACTTTGGGTGGTTACA CAATGAAAAATTAAGAAAA

[+65,850 base pairs]

TTCGGTTACACAGCTAATGCTCTTACTCACCACACTGCACTCGTGAGGGCTGTGAGACTCTTCCTTCCCCAGGG  
AGAAGTGCCAGCAGCAGCCAATGGAAAGGGGACTTGCCCTGCTGGCTGGAGGACCCCGCCCTGGGGCTCACGGCA  
GCCACAGAAATGAGTGAGTATTGCTGGTTGTAGTTGGAGTCACCAATGCCTTTTCTTCCCTCACATGGGGCAACC  
TTAGGAAGGTGCTCTCTCCCCACTTACTCTCTGCTCTGGGCTCCCCCATCTCTGCCATCCTGGCTCCATAC  
AGAGCATCCAAGCATCACCTTGGACCTCCAGTTGGCACTGGGCAAACCAACATAGAGAACCAAGACAAAGCACA  
ACCTTAAATCATGTAAGTGGAAATAGAGGAGTCTGTCTCTGCTGATCTAGGACCTGATTTCTTCTAATTTCCC  
AATCTCTTCTTACTCCAGGTTTTCTGATTTCTTTCAAGTACTTCTGAAGCCAAGCCACTCTGGGCTTTGGGGC  
ACTGGAACATTTCTTATTGTCCTACTCACTGCCCTTGTATGTGTGTGCCCTGGCAGTCTGTGAGGAGGGAGGC  
CATGTAATTAACGAAGTGTGGCAAGCACAGGCCAGGCATGCAGCAGGCACCAAAAATGTCTATTGTACTAATA  
GATGACTACAGACAGTGTAGGTTCTCACTTCTGTTTCTAGGTAATTCTCTGCCTCGTTTACTCTGAAGTCACAC  
AGGGCCAGGATAGGAAGTGGGCTTGTGTGATGCTTGTGCACCAGCTGACACATCATCTTTTTCGTGATTTCTCTT  
TTTCCGATGAAGTTGGAAACTTTCAATCTAGAAGGGTCTCAGCTGAGGGATTGTGACTTTAGGGAGGTAGAGA  
GGGCACTTGGGAAGCCAGAATTCATGTTGGATAAATGTTTGTGAGTTTCTGGGTTAGATTTTTTCACTTCTGAGGA  
GTTTCATGAGAGCAACCTAAGAATCAGTCTGCTGAGGTTTCAAGGACAGTGCCTGGGCTTGGCTGTGGCGGGAAGC  
TCCGGGAGAGGAAAGTGGACAGGCTGCTGATACAGTCTTGCATTGCAGCAGTCTTGCCTTCAAGGGTGCACACA  
AGTCTGAAGCCACCATGTATTTCTGTGGCTCTGGGACAAGGGGGACAGCTGACTTTCCCCAGCCATAGGATGG  
GGTGGTCTCGACAAATATCAATAGTTCCAAAGTACCAAAGATTGGCTCTTGGTAGTTTGCCAAACCAAAGGCTT  
CACAGCAGCCCTAGGAAGCTGGCAGGAAGCTGCTATTCCCATTTAATTGACAAGGGCATTGAGTCCAAAATCCTT  
CCCTGCTGGCTGCTTTACCACCCTTACGCTGTCTCTCACCTTGAAGTGGGAGAAGACATGACTGAAAGGGCAG  
GCTGCAGTGCAAATGACTATAGGTGCGTGGCTGGGAGATGGGATGCTCTGGCTCTGACGTCTGCTCCCAAACCT

[+2,175 base pairs]

TGCCTAGCATCTGGTAGCACATATTTGTCAAAGAACAAGTATTCTTAATGGCA **TCATTCAACTCAGCCATCA**  
**TTAACTTGGTACCTATTATGTGCTAGGTACCATTGATCCAGAGGTGACTGAGCATGGGTGCCACCTGGAAGAAGT**  
**CTCGGTCTAGGGTGGGGACAGAATGTAACCA**TCGGTACCACCTTAAACACTTCGAAAAGTACTGTGGAGAATGAA  
**TGGATGGCAAATGACTTATCAGAGCCAGCATTGAGGAATGAGCCAAGTCCAATGGGAACACAGGAAAAGGACCTT**

TTGCTCTGCCAGGAGAGTACAGAAGGCTTTGCTGGTGGAGGATGAGATGCAATTTAGCCTGAAATGATGAGGA  
GTTTGTCTTCAGCCATGTGGAGAAAGGAGCATTCCAGGCAGAGGGACCAGTCTGAGCAAAGGCATTCGGGTGTAA  
AATTATTGCCTAGGATTGGAGTGAAGGATATGTAGCGCTACTGACAAGAGACTCCTCTTCAAGAGCAGGCCACAT  
ATCCTTTATTTCCCAGGGGGTGGAAACGGGCAACCTCACAGAGGAATTGAATCATAATGAATFGAAGAAAAGAAA  
ATCTCCTGAAGTTGGCATTATAATTAATAGGCTTAGGCTCATCTACTAGTCTCACTTAGACTCATTTCTCATGT

[+525 base pairs]

TTCTGCTAAGATTTGGGGATTTTCAGGCCTGGAGGGAAAGTCCCTTGGGACGATCATAGAGCGCTAGCACTGAAT  
CAGCCTGGAGAGCGCGGAAGGAAAGGGTCGGTCCGCAGAGGGCGCGGGGAAGGCAGGGTGGGGACCGCGGTGGAGC  
CCGCGCTCGTTTTGCTGAAGGCTTGGAAAGTGCAGCGCAGAAGACAGAGGGTGACTAGGAAGACGCGCGAGCGGGGC

[+150 base pairs]

CAGTCTCTCTTAAAAGGCTGTGCCGAGGGCTGGCCAGTGAGGCTCGGCCCGGGGAAAGTGAAAGTTGCCTGGG  
TCCTCTCGGCGCCAGAGCCGCTCTCCGCATCCCAGGACAGCGGTGCGGCCCTCGGCCGGGGCGCCACTCCGCAG  
CAGCCAGCGAGCGAGCGAGCGAGCGAGGGCGGCCGACGCGCCCGGCCGGGACCCAGCTGCCCGTATGACCGCGCC  
GGGCGCCCGGGCGCTGCCCTCCACGGTAAGCGACGGCCGCGCGCTGGGCCCCGGGACGGGCTGGGGCGGGGG

[+3,075 base pairs]

TCTGCGTTGAGCAGGGCATGGGGATAACTGGGGAGAGTGAGACCTGGGGAGAAATGACACCCTCTCTGTCACAGA  
CATGGCTGGGCTCCCTGCTGTTGTTGGTCTGTCTCTCTGGCGAGCAGGAGTATCACCGAGGAGGTGTCGGAGTACT  
GTAGCCACATGATTGGGAGTGGACACCTGCAGTCTCTGCAGCGGCTGTGAGTGTGTGGCCATGCTGTATTCTAC

[+1,200 base pairs]

TCGTTGGCCTGCTCTCTTTACAGATTGACAGTCAGATGGAGACCTCGTGCCAAATTACATTTGAGTTGTAGAC  
CAGGAACAGTTGGTGTAGTGATGGCTTTTTTACAAAATCCATGCACCAGCCTGCATGCAACTCCCAGGGTGGGGTGT

[+1,500 base pairs]

CCAGGCCATAAGCTCCAGGTTCCCTGTTTTTTCAGAAAGATCCAGTGTGCTACCTTAAGAAGGCATTTCTCTGGTA  
CAAGACATAATGGAGGACACCATGCGCTTCAGAGATAACACCCCCAATGCCATCGCCATTGTGCAGCTGCAGGAA  
CTCTCTTTGAGGCTGAAGAGCTGCTTCACCAAGGATTATGAAGAGCATGACAAGGTAGGAAGCCCTGAGGCCTGG

[+4,350 base pairs]

ATCTCCTTCCAGGCCTGCGTCCGAACCTTCTATGAGACACCTCTCCAGTTGCTGGAGAAGGTCAAGAATGTCTTT  
AATGAAACAAAGAATCTCCTTGACAAGGACTGGAATATTTTTCAGCAAGAAGTCAACAACAGCTTTGCTGAATGC  
TCCAGCCAAGGTAAGCATGGCAGGGGCCAGCAAGTGTGTGGGGGTGGTAGCATATGGAATGGGGATTGGGAGGTG

[+1,050 base pairs]

TAGTGACTCTATCTCTCTCCCATCTTTCTCTCTCTCTCTCTGTGGTTCTTTTCAGATGTGGTGACCAAGCCTGA  
TTGCAACTGCCTGTACCCCAAAGCCATCCCTAGCAGTGACCCGGCCTCTGTCTCCCCTCATCAGCCCCTCGCCCC  
CTCCATGGCCCCCTGTGGCTGGCTTGACCTGGGAGGACTCTGAGGGAACTGAGGGCAGCTCCCTCTTGCTGGTGA  
GCAGCCCCCTGCACACAGTGGATCCAGGCAGTGCCAAGCAGCGCCACCCAGGAGCACCTGCCAGAGCTTTGAGCC  
GCCAGAGACCCCAGTTGTCAAGGACAGCACCATCGGTGGCTCACCACAGCCTCGCCCCCTGTTCGGGGCCTTCAA  
CCCCGGGATGGAGGATATTCTTGACTCTGCAATGGGCACTAATTGGGTCCAGAAGAAGCCTCTGGAGAGCCAG  
TGAGATTCCCGTACCCCAAGGGACAGAGCTTTCCCCCTCCAGGCCAGGAGGGGGCAGCATGCAGACAGAGCCCGC  
CAGACCCAGCAACTTCTCTCAGCATCTTCTCCACTCCCTGCATCAGCAAAGGGCCAACAGCCGGCAGATGTAAC  
TGGTACCGCCTTGCCCAGGGTGGGCCCCGTGAGGCCACTGGCCAGGACTGGAATCACACCCCCCAGAAGACAGA  
CCATCCATCTGCCCTGCTCAGAGACCCCCCGGAGCCAGGCTCTCCCAGGATCTCATCACTGCGCCCCCAGGGCCT  
CAGCAACCCCTCCACCCTCTCTGCTCAGCCACAGCTTTCCAGAAGCCACTCCTCGGGCAGCGTGTGCCCTTGG  
GGAGCTGGAGGGCAGGAGGAGCACCAGGGATCGGAGGAGCCCCCGAGAGCCAGAAGGAGGACCAGCAAGTGAAGG  
GGCAGCCAGGCCCTGCCCGTTTTAACTCCGTTCTTTGACTGACACAGGCCATGAGAGGCAGTCCGAGGGATC

CTTCAGCCCGCAGCTCCAGGAGTCTGTCTTCCACCTGCTGGTGCCAGTGTGCATCCTGGTCTTGCTGGCCGTCGG  
AGGCCTCTTGTTCTACAGGTGGAGGCGGCGGTGAGTAGATCCCCATGAGGAAGAAGAGCACGTCCCTTAGGGCA

[+525 base pairs]

TCTTTCCTGTCTCAGAGCCATCAAGAGCCTCAGAGAGCGGATTCTCCCTTGGAGCAACCAGAGGGCAGGTGAGA

[+300 base pairs]

CTCTGCCTGCAGCCCCCTGACTCAGGATGACAGACAGGTGGAAGTCCAGTGTAGAGGGGAATTCTAAGGTAAGAT

[+825 base pairs]

AACGTTCCCTTATATGATATGGTTTTTCAGACCCCTCACCATCCTGGACACACTCGTTTGCAATGTCCCTCTGAAA  
ATGTGACGCCAGCCCCGGACACAGTACTCCAGATGTTGTCTGACCAGCTCAGAGAGAGTACAGTGGGACTGTTA  
CCTTCCTTGATATGGACAGTATTCTTCTATTTGTGCAGATTAAGATTGCATTAGTTTTTTTTCTTAACAACCTGCAT  
CATACTGTTGTGCATATGTTGAGCCTGTGGTCTATTAACCCCTAGTTCCATTTCCCATAAACTTCTGTCAAGCC  
AGACCATCTCTACCCTGTACTTGGACAACCTTAACCTTTTTTAACCAAAGTGCAGTTTTATGTTACCTTTGTAAAG  
CCACCTTGTTGGTTTCTGCCATCACCTGAACCTACTGAAGTTGTGTGAAATCCTAATTCTGTGCATCTCCGTAGC  
CCTCCCAGTTGTGCCTCCTGCACATTGATGAGTGCCTGCTGTTGTCTTTGCCATGTTGTTGATGTAGCTGTGAC  
CCTATTGTTCCCTCACCCCTGCCCCCGCCAACCCAGCTGGCCACCTCTCCCCCTCCACCAAGCCACAGC  
CAGCCCATCAGGAAGCCTTCTGGCTTCTCCACAACCTTCTGACTGCTCTTTTCAGTCATGCTCCTCCTGCTCTT  
TTGTATTTGGCTAATAGTATATCAATTTGCACTTAATTGGATGTTGTTTTTCATATTTTTTAAAAATCTTATTTTAT

[+2,025 base pairs]

GCATTCCCCTCTGCTGACTAGCCTTTTCTTCTCTCCACAGCTGGACGCACAGAACAGTCTCTCCGTGGGAGGA  
GACATTATGGGGCGTCCACCACCACCCTCCCTGGCCATCCTCCTGGAATGTGGTCTGCCCTCCACCAGAGCTCC  
TGCCTGCCAGGACTGGACCAGAGCAGCCAGGCTGGGGCCCTCTGTCTCAACCCGCAGACCCTTGACTGAATGAG  
AGAGGCCAGAGGATGCTCCCCATGCTGCCACTATTTATTGTGAGCCCTGGAGGCTCCCATGTGCTTGAGGAAGGC  
TGGTGTAGCCCGGCTCAGGACCCTCTTCCCTCAGGGGCTGCACCCTCCTCTCACTCCCTTCCATGCCGAACCCAG  
GCCAGGGACCCACCGCCTGTGGTTTGTGGGAAAGCAGGGTGGACGCTGAGGAGTGAAGAACCCTGCACCCAGA  
GGGCCTGCCTGGTGCCTAAGGTATCCCAGCCTGGACAGGCATGGACCTGTCTCCAGAGAGAGGAGCCTGAAGTTCC  
TGGGGCGGGACAGCGTCCGCCTGATTTCCCGTAAAGGTGTGCAGCCTGAGAGACGGGAAGAGGAGGCTCTGGAC  
CTGCTGGTCTGCACTGACAGCCTGAAGGGTCTACACCCTCGGCTCACCTAAGTGCCTGTGCTGGTTGCCAGGCG  
CAGAGGGGAGGCCAGCCCTGCCCTCAGGACCTGCCTGACCTGCCAGTGATGCCAAGAGGGGGATCAAGCACTGGC  
CTCTGCCCTCCTCCTTCCAGCACCTGCCAGAGCTTCTCCAGGAGGCCAAGCAGAGGCTCCCCTCATGAAGGAAG  
CCATTGCACTGTGAACACTGTACCTGCCTGCTGAACAGCCTGCCCCGTCATCCATGAGCCAGCATCCGTCCGT  
CCTCCACTCTCCAGCCTCTCCCCAGCCTCCTGCACTGAGCTGGCCTCACAGTGCCTGAGGGAGCCCTCAGCC  
CTGACCTTCTCCTGACCTGGCCTTTGACTCCCCGGAGTGGAGTGGGGTGGGAGAACCCTCTGGGCCGCCAGCCAG  
AGCCGGTCTTTAGGCTGTGTTGTTGCGCCAGGTTTCTGCATCTTGCCTTTGACATTTCCCAAGAGGGGAAGGGACT  
AGTGGGAGAGAGCAAGGGAGGGGAGGGCACAGACAGAGAGGCTACAGGGCGAGCTCTGACTGAAGATGGGCCCTTT  
GAAATATAGGTATGCACCTGAGGTTGGGGGAGGGTCTGCACTCCCAAACCCAGCGCAGTGTCTTTCCCTGCTG  
CCGACAGGAACCTGGGGCTGAACAGGTTATCCCTGTCAGGAGCCCTGGACTGGGCTGCATCTCAGCCCCACCTGC  
ATGGTATCCAGCTCCCATCCACTTCTCACCTTCTTTCCCTCCTGACCTTGGTCAGCAGTGATGACCTCCAACCTCT  
CACCCACCCCTCTACCATCACCTCTAACAGGCAAGCCAGGGTGGGAGAGCAATCAGGAGAGCCAGGCTCAGC  
TTCCAATGCCTGGAGGGCCTCCACTTTGTGGCCAGCCTGTGGTGGTGGCTCTGAGGCTTAGGCAACGAGCGACAG  
GGCTGCCAGTTGCCCTGGGTTCTTTGTGCTGCTGTGTGCCTCCTCTCCTGCCGCCCTTTGTCTCCGCTAAGA  
GACCCTGCCCTACCTGGCCGCTGGGCCCGTGACTTTCCCTTCTGCCAGGAAAGTGGGGTGGGCTGGCCCCA  
CCTTCCCTGTCTGATGCCGACAGCTTAGGGAAGGGCAGTGAACCTGCATATGGGGCTTAGCCTTCTAGTCACAG  
CCTCTATATTTGATGCTAGAAAACACATATTTTTAAATGGAAGAAAAATAAAAAGGCATTTCCCTTCTATCCCC  
TACCTTAAACATATAATATTTTTAAAGGTCAAAAAGCAATCCAACCCACTGCAGAAGCTCTTTTTGAGCACTGG  
TGGCATCAGAGCAGGAGGAGCCCCAGAGCCACCTCTGGTGTCCCCCAGGCTACCTGCTCAGGAACCCCTTCTGT  
TCTCTGAGAAGTCAAGAGAGGACATTGGCTCACGCACTGTGAGATTTTTGTTTTTATACTTGGAAAGTGGTGAATTA  
TTTTATATAAAGTCATTTAAATATCTATTTAAAGATAGGAAGCTGCTTATATATTTAATAATAAAGAAGTGCA  
CAAGCTGCCATGTGAGTCGTGGGAAAGTTGCTTTTGGGGTGTGGGTGGCAAACATCAGGGTGGGTGGGCAGCA

## 2. RepeatMasker results for the sequence of human chromosome 1 including THOLE and CSF1 (NC\_000001 REGION: 109831234..109931057)

Repeats discussed in the manuscript are highlighted yellow (LTR8/HUERS-P1) and orange (L2c).

| Smith-Waterman score | % div. | % del. | % ins. | position in query |       |             | matching repeat | repeat class/family | position in repeat |      |              | linkage id |
|----------------------|--------|--------|--------|-------------------|-------|-------------|-----------------|---------------------|--------------------|------|--------------|------------|
|                      |        |        |        | begin             | end   | orientation |                 |                     | (left) begin       | end  | begin (left) |            |
| 5025                 | 9.6    | 1.6    | 0.9    | 73                | 518   | +           | LTR8            | LTR/ERV1            | 1                  | 453  | -238         | 1          |
| 2211                 | 11.7   | 1      | 0.3    | 519               | 828   | C           | AluSx           | SINE/Alu            | 0                  | 312  | 1            | 2          |
| 5025                 | 9.6    | 1.6    | 0.9    | 829               | 1067  | +           | LTR8            | LTR/ERV1            | 454                | 691  | 0            | 1          |
| 36461                | 7.4    | 2.1    | 0.6    | 1068              | 2623  | +           | HUERS-P1-int    | LTR/ERV1            | 1                  | 1624 | -4639        | 1          |
| 1655                 | 11.7   | 11.2   | 1.6    | 2624              | 2900  | C           | AluSx           | SINE/Alu            | -9                 | 303  | 1            | 3          |
| 36461                | 7.4    | 2.1    | 0.6    | 2901              | 5645  | +           | HUERS-P1-int    | LTR/ERV1            | 1625               | 4368 | -1895        | 1          |
| 3466                 | 4.2    | 7.4    | 0      | 5646              | 6077  | C           | LTR7B           | LTR/ERV1            | 0                  | 464  | 1            | 4          |
| 36461                | 8.7    | 1.4    | 1.2    | 6078              | 7865  | +           | HUERS-P1-int    | LTR/ERV1            | 4369               | 6263 | 0            | 1          |
| 4851                 | 9.6    | 4.1    | 0.1    | 7866              | 8530  | +           | LTR8            | LTR/ERV1            | 1                  | 691  | 0            | 1          |
| 380                  | 25     | 4.7    | 5.6    | 8811              | 8937  | C           | MER112          | DNA/hAT-Charlie     | -32                | 229  | 104          | 5          |
| 238                  | 23.8   | 17.5   | 0      | 8941              | 9020  | +           | Charlie10       | DNA/hAT-Charlie     | 1                  | 94   | -2728        | 6          |
| 4629                 | 11.7   | 7.3    | 1.2    | 9033              | 9786  | +           | L1MB8           | LINE/L1             | 5379               | 6177 | -1           | 7          |
| 2370                 | 8.4    | 0      | 1      | 9797              | 10109 | +           | AluY            | SINE/Alu            | 1                  | 310  | -1           | 8          |
| 538                  | 21.8   | 3.5    | 5.8    | 10124             | 10264 | +           | MER5C1          | DNA/hAT-Charlie     | 98                 | 235  | -28          | 9          |
| 1659                 | 11.8   | 0      | 0      | 10266             | 10486 | +           | AluSx           | SINE/Alu            | 78                 | 298  | -14          | 10         |
| 16126                | 1.6    | 0.1    | 0      | 10557             | 13150 | +           | L1PA3           | LINE/L1             | 3560               | 6155 | 0            | 11         |
| 326                  | 23     | 4      | 0      | 13177             | 13250 | C           | MER112          | DNA/hAT-Charlie     | -184               | 77   | 1            | 5          |
| 1024                 | 24.9   | 1.5    | 0.8    | 14531             | 14789 | +           | MIR             | SINE/MIR            | 2                  | 262  | 0            | 12         |
| 257                  | 30.7   | 5.7    | 0      | 14913             | 15000 | C           | MIRb            | SINE/MIR            | -69                | 199  | 107          | 13         |
| 460                  | 13.5   | 2.7    | 1.3    | 15191             | 15263 | +           | MER84           | LTR/ERV1            | 1                  | 74   | -433         | 14         |
| 2888                 | 12.5   | 4.3    | 6.8    | 15264             | 15435 | +           | MER84           | LTR/ERV1            | 2                  | 146  | -361         | 15         |
| 2151                 | 11.6   | 0.7    | 2      | 15436             | 15743 | C           | AluSx           | SINE/Alu            | -8                 | 304  | 1            | 16         |
| 2888                 | 12.5   | 4.3    | 6.8    | 15744             | 16084 | +           | MER84           | LTR/ERV1            | 147                | 503  | -4           | 15         |
| 472                  | 31.3   | 0.8    | 0      | 16488             | 16618 | C           | MamGypLTR3a     | LTR/Gypsy           | -542               | 439  | 308          | 17         |
| 1993                 | 16.9   | 0.3    | 0      | 16757             | 17063 | +           | AluJb           | SINE/Alu            | 1                  | 308  | -4           | 18         |
| 2213                 | 11.2   | 0.3    | 0.3    | 17193             | 17489 | C           | AluSx           | SINE/Alu            | -14                | 298  | 2            | 19         |
| 434                  | 28.5   | 4.1    | 5.7    | 18517             | 18713 | C           | L3              | LINE/CR1            | -248               | 3851 | 3658         | 20         |
| 1282                 | 19.7   | 5.8    | 0.7    | 18743             | 19033 | +           | L1MC4a          | LINE/L1             | 7571               | 7876 | -6           | 21         |
| 586                  | 24.5   | 23.3   | 1.8    | 19060             | 19342 | +           | MLT2F           | LTR/ERV1            | 1                  | 343  | -320         | 22         |
| 727                  | 33.6   | 2.2    | 0.6    | 19497             | 19816 | C           | L3              | LINE/CR1            | -578               | 3521 | 3197         | 20         |
| 9033                 | 7.9    | 0.3    | 0.8    | 19831             | 20999 | +           | L1P2            | LINE/L1             | 1                  | 1163 | -5021        | 23         |
| 5544                 | 8.5    | 5      | 0.3    | 21000             | 21744 | C           | LTR17           | LTR/ERV1            | 0                  | 780  | 1            | 24         |
| 2414                 | 6.3    | 1.4    | 0      | 21745             | 22044 | C           | HERV17-int      | LTR/ERV1            | 0                  | 8626 | 8335         | 24         |
| 291                  | 5      | 0      | 0      | 22023             | 22062 | C           | HERV17-int      | LTR/ERV1            | -1078              | 7548 | 7509         | 24         |
| 30151                | 5      | 0.4    | 0.1    | 22055             | 25635 | C           | HERV17-int      | LTR/ERV1            | -2607              | 6019 | 2430         | 24         |
| 7994                 | 5.4    | 0.4    | 0.6    | 25619             | 26593 | C           | HERV17-int      | LTR/ERV1            | -6610              | 2016 | 1044         | 24         |
| 2480                 | 6.1    | 0      | 1      | 26596             | 26909 | C           | LTR17           | LTR/ERV1            | -469               | 311  | 1            | 25         |
| 9243                 | 6      | 1.4    | 0.2    | 26911             | 30907 | +           | L1PA6           | LINE/L1             | 1320               | 6328 | -1           | 26         |

|      |      |      |      |       |       |   |             |                 |       |      |       |    |
|------|------|------|------|-------|-------|---|-------------|-----------------|-------|------|-------|----|
| 293  | 25   | 2.3  | 2.3  | 30992 | 31077 | C | L3          | LINE/CR1        | -1030 | 3069 | 2984  | 20 |
| 339  | 29   | 0    | 2    | 31135 | 31232 | C | MamGypLTR3a | LTR/Gypsy       | 0     | 981  | 886   | 27 |
| 1312 | 20.2 | 4.8  | 8.6  | 31233 | 31628 | C | MLT1B       | LTR/ERV1-MaLR   | -3    | 387  | 6     | 28 |
| 1993 | 11.6 | 11   | 9    | 31665 | 31780 | C | LTR56       | LTR/ERV1        | 0     | 445  | 329   | 29 |
| 1999 | 12.5 | 1    | 1    | 31781 | 32071 | C | AluSx       | SINE/Alu        | -21   | 291  | 1     | 30 |
| 1993 | 11.6 | 11   | 9    | 32072 | 32167 | C | LTR56       | LTR/ERV1        | -117  | 328  | 237   | 29 |
| 2155 | 10.8 | 2.3  | 0.6  | 32168 | 32474 | + | AluSx       | SINE/Alu        | 1     | 312  | 0     | 31 |
| 1993 | 11.6 | 11   | 9    | 32475 | 32697 | C | LTR56       | LTR/ERV1        | -209  | 236  | 1     | 29 |
| 2852 | 13.2 | 5    | 2    | 32864 | 33383 | C | MER41B      | LTR/ERV1        | -38   | 596  | 1     | 32 |
| 1025 | 27.2 | 8    | 7.2  | 33652 | 34039 | C | MamGypLTR3a | LTR/Gypsy       | -590  | 391  | 1     | 33 |
| 402  | 28.5 | 17.4 | 0.7  | 34115 | 34361 | C | L3          | LINE/CR1        | -1373 | 2726 | 2439  | 20 |
| 279  | 29.9 | 5.5  | 2.4  | 34402 | 34603 | C | L3          | LINE/CR1        | -1738 | 2361 | 2154  | 20 |
| 278  | 34.3 | 1    | 1    | 34695 | 34794 | C | L2b         | LINE/L2         | -18   | 3357 | 3258  | 34 |
| 704  | 15   | 3.8  | 0    | 34971 | 35103 | + | L1MC1       | LINE/L1         | 5292  | 5429 | -915  | 35 |
| 1447 | 17.6 | 4.8  | 5.8  | 35101 | 35413 | + | L1MC1       | LINE/L1         | 6018  | 6327 | -6    | 35 |
| 401  | 33   | 8.4  | 6.8  | 35423 | 35878 | C | L2b         | LINE/L2         | -274  | 3101 | 2655  | 34 |
| 269  | 33.3 | 13.2 | 1.7  | 35963 | 36280 | C | L3          | LINE/CR1        | -2006 | 2093 | 1740  | 20 |
| 695  | 19   | 19   | 0    | 36325 | 36519 | C | MIR         | SINE/MIR        | -24   | 238  | 7     | 36 |
| 2139 | 10.6 | 3.6  | 0    | 36630 | 36930 | + | AluSx       | SINE/Alu        | 1     | 312  | 0     | 37 |
| 1895 | 13.8 | 0.3  | 4.2  | 37088 | 37382 | + | AluJb       | SINE/Alu        | 1     | 284  | -28   | 38 |
| 283  | 19.1 | 3.1  | 12.5 | 37662 | 37757 | + | MER5B       | DNA/hAT-Charlie | 66    | 153  | -25   | 39 |
| 2272 | 9.7  | 0.3  | 0    | 38268 | 38556 | C | AluY        | SINE/Alu        | -21   | 290  | 1     | 40 |
| 1186 | 16.6 | 1.9  | 3.9  | 38989 | 39195 | + | AluJb       | SINE/Alu        | 86    | 288  | -24   | 41 |
| 2391 | 9.8  | 0.7  | 0    | 39278 | 39583 | C | AluSx       | SINE/Alu        | -4    | 308  | 1     | 42 |
| 238  | 16.1 | 8.4  | 0.6  | 39642 | 39715 | C | L1MC1       | LINE/L1         | 0     | 6344 | 6264  | 43 |
| 647  | 29.7 | 4.9  | 3.2  | 39713 | 40077 | C | L1ME4a      | LINE/L1         | -229  | 5895 | 5525  | 44 |
| 2372 | 18.2 | 3.6  | 0.8  | 40125 | 40596 | + | MLT1D       | LTR/ERV1-MaLR   | 21    | 505  | 0     | 45 |
| 2326 | 9.9  | 0.3  | 2    | 40629 | 40936 | C | AluSx       | SINE/Alu        | -9    | 303  | 1     | 46 |
| 251  | 28.1 | 2.6  | 6.4  | 41318 | 41431 | + | MLT1D       | LTR/ERV1-MaLR   | 476   | 585  | -10   | 45 |
| 305  | 30.3 | 1.6  | 0.8  | 41599 | 41721 | + | MLT1D       | LTR/ERV1-MaLR   | 170   | 293  | -1094 | 45 |
| 253  | 30.4 | 6    | 1.6  | 42367 | 42483 | C | MER5A       | DNA/hAT-Charlie | -25   | 164  | 43    | 47 |
| 827  | 28.7 | 2.8  | 0.4  | 43065 | 43319 | C | MIR         | SINE/MIR        | 0     | 262  | 2     | 48 |
| 354  | 22.6 | 3.5  | 2.8  | 43399 | 43539 | + | L1MEi       | LINE/L1         | 663   | 804  | -1408 | 49 |
| 441  | 26.8 | 7.3  | 0    | 43510 | 43549 | + | L1MEi       | LINE/L1         | 1174  | 1221 | -991  | 49 |
| 2075 | 12.4 | 1    | 0    | 43550 | 43839 | + | AluSx       | SINE/Alu        | 20    | 312  | 0     | 50 |
| 441  | 26.8 | 7.3  | 0    | 43840 | 43962 | + | L1MEi       | LINE/L1         | 1222  | 1348 | -864  | 49 |
| 268  | 18.8 | 2.1  | 0    | 43974 | 44021 | + | MLT1D       | LTR/ERV1-MaLR   | 1258  | 1306 | -81   | 45 |
| 404  | 28   | 7.8  | 0.5  | 44655 | 44854 | + | L1ME4c      | LINE/L1         | 5474  | 5688 | -436  | 51 |
| 515  | 32.8 | 0.5  | 0    | 45402 | 45587 | C | L1ME4a      | LINE/L1         | -262  | 5862 | 5676  | 52 |
| 242  | 26.4 | 2.8  | 7.8  | 46718 | 46824 | + | L2a         | LINE/L2         | 3109  | 3210 | -177  | 53 |
| 452  | 24.8 | 6    | 0    | 46906 | 47038 | + | L2a         | LINE/L2         | 3267  | 3407 | -19   | 53 |
| 364  | 27.5 | 3.6  | 0.9  | 47121 | 47230 | + | SVA_A       | Retroposon/SVA  | 200   | 312  | -1075 | 54 |
| 473  | 18.2 | 1.3  | 0    | 47174 | 47250 | C | 7SLRNA      | srpRNA          | -241  | 79   | 2     | 55 |
| 205  | 21.7 | 4.3  | 0    | 47640 | 47685 | C | MIR3        | SINE/MIR        | -55   | 153  | 106   | 56 |
| 611  | 26   | 1.6  | 2.7  | 47897 | 48082 | + | Eutr18      | LTR             | 246   | 429  | -207  | 57 |
| 2270 | 9.3  | 0.3  | 1    | 48410 | 48712 | + | AluSx       | SINE/Alu        | 1     | 301  | -11   | 58 |
| 859  | 22.7 | 19.1 | 0.9  | 48865 | 49280 | C | L2          | LINE/L2         | -421  | 2998 | 2508  | 59 |



|      |      |      |      |       |       |   |          |                   |       |      |       |    |
|------|------|------|------|-------|-------|---|----------|-------------------|-------|------|-------|----|
| 290  | 24.4 | 17.7 | 1.5  | 49311 | 49485 | C | MIRb     | SINE/MIR          | -30   | 238  | 36    | 60 |
| 258  | 22.7 | 38.6 | 0    | 50252 | 50414 | C | MIRb     | SINE/MIR          | -9    | 253  | 34    | 61 |
| 341  | 22.2 | 1.4  | 0    | 51987 | 52058 | C | MIR      | SINE/MIR          | -129  | 133  | 61    | 62 |
| 213  | 31.5 | 4.8  | 9.2  | 52793 | 52939 | C | L2d      | LINE/L2           | -37   | 3388 | 3248  | 63 |
| 184  | 32   | 5    | 5.7  | 53657 | 53815 | C | L2d2     | LINE/L2           | -10   | 3365 | 3208  | 64 |
| 293  | 17.5 | 0    | 0    | 53888 | 53950 | + | L1MD     | LINE/L1           | 5696  | 5758 | -2237 | 65 |
| 285  | 20.3 | 10.1 | 3.4  | 53998 | 54108 | C | L2d2     | LINE/L2           | -250  | 3137 | 3031  | 64 |
| 255  | 27.9 | 9.2  | 1.1  | 54114 | 54200 | C | MER117   | DNA/hAT-Charlie   | -1    | 196  | 103   | 66 |
| 221  | 29.4 | 9.4  | 0    | 54393 | 54477 | C | MIR3     | SINE/MIR          | -76   | 132  | 40    | 67 |
| 368  | 37.4 | 6.2  | 1.8  | 55675 | 56091 | + | L2c      | LINE/L2           | 1982  | 2416 | -1003 | 68 |
| 424  | 28.8 | 6.4  | 5.5  | 56509 | 56943 | C | L2c      | LINE/L2           | -2    | 3373 | 2888  | 69 |
| 270  | 26   | 10.6 | 0    | 57059 | 57162 | C | L2c      | LINE/L2           | -675  | 2744 | 2630  | 69 |
| 1121 | 12.4 | 3.8  | 0.5  | 57323 | 57508 | C | MER53    | DNA/hAT-Blackjack | -1    | 192  | 1     | 70 |
| 864  | 35   | 11.1 | 1.6  | 57910 | 58215 | C | L2c      | LINE/L2           | -1559 | 1860 | 1526  | 69 |
| 2067 | 11.9 | 0    | 2    | 58216 | 58523 | C | AluSx    | SINE/Alu          | -9    | 303  | 2     | 71 |
| 864  | 35   | 11.1 | 1.6  | 58524 | 59214 | C | L2c      | LINE/L2           | -1894 | 1525 | 770   | 69 |
| 246  | 31   | 2.4  | 11.9 | 59234 | 59398 | + | LTR89    | LTR/ERVL          | 556   | 706  | -173  | 72 |
| 237  | 42   | 1    | 2    | 60022 | 60218 | + | L2c      | LINE/L2           | 3069  | 3263 | -124  | 68 |
| 420  | 30.8 | 11.9 | 1.1  | 60223 | 60475 | C | L2c      | LINE/L2           | -2    | 3385 | 3106  | 73 |
| 266  | 32.9 | 5.2  | 1.2  | 60498 | 60651 | + | L2b      | LINE/L2           | 3209  | 3368 | -7    | 74 |
| 279  | 30.8 | 5.5  | 1.8  | 61858 | 62012 | + | MIRb     | SINE/MIR          | 21    | 183  | -85   | 75 |
| 1097 | 27.1 | 10.2 | 3.9  | 62076 | 62735 | C | L2a      | LINE/L2           | -3    | 3423 | 2713  | 76 |
| 414  | 29.9 | 10.8 | 2.9  | 63204 | 63568 | C | L2a      | LINE/L2           | -27   | 3399 | 2968  | 77 |
| 442  | 34.8 | 12.1 | 2.5  | 63579 | 64209 | + | L2b      | LINE/L2           | 2691  | 3374 | -1    | 78 |
| 1063 | 24.7 | 8.5  | 0.8  | 66131 | 66493 | + | L2a      | LINE/L2           | 3036  | 3426 | 0     | 79 |
| 729  | 21.6 | 3.9  | 0    | 66555 | 66707 | + | MER58A   | DNA/hAT-Charlie   | 1     | 159  | -65   | 80 |
| 366  | 34   | 13.3 | 4.8  | 66744 | 67111 | + | L2b      | LINE/L2           | 2977  | 3374 | -13   | 81 |
| 2099 | 11.5 | 0    | 2.7  | 67114 | 67416 | + | AluSx    | SINE/Alu          | 2     | 296  | -16   | 82 |
| 339  | 14   | 0    | 1.8  | 67468 | 67525 | + | MER58A   | DNA/hAT-Charlie   | 168   | 224  | 0     | 83 |
| 772  | 23.8 | 2.8  | 0    | 67526 | 67706 | C | MIR      | SINE/MIR          | -64   | 198  | 13    | 84 |
| 1652 | 16.7 | 9.7  | 5.3  | 68067 | 68446 | C | MSTD     | LTR/ERVL-MaLR     | 0     | 396  | 1     | 85 |
| 1807 | 11.4 | 6.6  | 0    | 68527 | 68799 | + | AluSx    | SINE/Alu          | 4     | 294  | -18   | 86 |
| 229  | 26.8 | 28.3 | 0    | 69276 | 69413 | C | MIRc     | SINE/MIR          | -20   | 248  | 72    | 87 |
| 408  | 31.5 | 12.4 | 4.1  | 69841 | 70245 | + | L2c      | LINE/L2           | 2931  | 3374 | -13   | 88 |
| 240  | 30.1 | 19.4 | 1.7  | 70817 | 71129 | C | L2c      | LINE/L2           | 0     | 3387 | 3024  | 89 |
| 248  | 29.7 | 8.4  | 3    | 71749 | 71939 | + | L2c      | LINE/L2           | 2943  | 3143 | -244  | 90 |
| 324  | 29.2 | 7    | 1.6  | 71928 | 72042 | + | L2c      | LINE/L2           | 3267  | 3387 | 0     | 90 |
| 810  | 25.4 | 3.4  | 0    | 72231 | 72466 | C | Zaphod5b | DNA/hAT-Tip100    | -99   | 307  | 64    | 91 |
| 194  | 14.7 | 0    | 0    | 72571 | 72604 | C | L2d      | LINE/L2           | -4    | 3421 | 3388  | 92 |
| 512  | 32.4 | 8.7  | 1.3  | 72705 | 72923 | C | MIRb     | SINE/MIR          | 0     | 268  | 34    | 93 |
| 437  | 32   | 6.2  | 2.2  | 72926 | 73157 | C | MIRb     | SINE/MIR          | -2    | 266  | 18    | 94 |
| 861  | 28.8 | 0    | 6.1  | 73892 | 73971 | C | MIR      | SINE/MIR          | -30   | 232  | 163   | 95 |
| 2389 | 7.2  | 0    | 0    | 73972 | 74278 | C | AluY     | SINE/Alu          | -4    | 307  | 1     | 96 |
| 861  | 28.8 | 0    | 6.1  | 74279 | 74441 | C | MIR      | SINE/MIR          | -100  | 162  | 3     | 95 |
| 185  | 31.8 | 6.1  | 0    | 75673 | 75738 | C | MIRc     | SINE/MIR          | -76   | 192  | 123   | 97 |
| 562  | 31   | 7.2  | 1.2  | 77268 | 77502 | C | MIRb     | SINE/MIR          | -6    | 262  | 14    | 98 |
| 562  | 24.4 | 9.2  | 1.7  | 77556 | 77718 | C | MIRb     | SINE/MIR          | -23   | 245  | 71    | 99 |

|      |      |      |      |       |       |   |            |                 |       |      |      |     |
|------|------|------|------|-------|-------|---|------------|-----------------|-------|------|------|-----|
| 204  | 26.9 | 1.9  | 0    | 77721 | 77772 | C | MIRb       | SINE/MIR        | -167  | 101  | 49   | 99  |
| 283  | 21.7 | 14.4 | 0    | 78035 | 78115 | + | L2a        | LINE/L2         | 3348  | 3432 | -32  | 100 |
| 332  | 30.6 | 3.2  | 0.8  | 78132 | 78256 | C | L2c        | LINE/L2         | -2    | 3385 | 3258 | 101 |
| 431  | 31.5 | 3.4  | 2.9  | 78308 | 78513 | C | L2c        | LINE/L2         | -143  | 3244 | 3038 | 101 |
| 243  | 36.2 | 3.9  | 2.2  | 81740 | 81917 | + | L2d        | LINE/L2         | 3077  | 3257 | -168 | 102 |
| 201  | 20.2 | 0    | 0    | 82778 | 82826 | C | L2c        | LINE/L2         | -293  | 3171 | 3122 | 103 |
| 265  | 28.9 | 16.5 | 3.1  | 83962 | 84161 | C | L3         | LINE/CR1        | -2    | 4097 | 3872 | 104 |
| 186  | 16.1 | 0    | 0    | 84667 | 84697 | C | MIRb       | SINE/MIR        | -23   | 245  | 215  | 105 |
| 225  | 28.8 | 0    | 0    | 84766 | 84824 | C | MIR        | SINE/MIR        | -177  | 85   | 27   | 106 |
| 224  | 30.5 | 17.1 | 1.7  | 84932 | 85188 | + | L2         | LINE/L2         | 2592  | 2887 | -532 | 107 |
| 197  | 32.4 | 8    | 3.4  | 85511 | 85622 | C | L2c        | LINE/L2         | -3    | 3384 | 3268 | 108 |
| 229  | 34.9 | 2.8  | 0    | 86397 | 86505 | C | L2b        | LINE/L2         | -44   | 3331 | 3220 | 109 |
| 747  | 24.8 | 2.4  | 7    | 86538 | 86789 | C | L2a        | LINE/L2         | -1    | 3425 | 3185 | 110 |
| 1257 | 29.5 | 16.3 | 2.2  | 86861 | 87868 | C | L2a        | LINE/L2         | -225  | 3162 | 2013 | 110 |
| 1712 | 17.9 | 3.3  | 0    | 87994 | 88295 | C | AluJb      | SINE/Alu        | 0     | 312  | 1    | 111 |
| 318  | 34.1 | 0    | 0.8  | 88331 | 88444 | C | MER5A      | DNA/hAT-Charlie | -2    | 187  | 75   | 112 |
| 1632 | 11   | 0.4  | 0    | 88445 | 88681 | + | AluSx      | SINE/Alu        | 1     | 238  | -74  | 113 |
| 318  | 34.1 | 0    | 0.8  | 88682 | 88696 | C | MER5A      | DNA/hAT-Charlie | -115  | 74   | 60   | 112 |
| 1633 | 9.4  | 1.2  | 18.4 | 89059 | 89383 | C | AluSx      | SINE/Alu        | -34   | 278  | 1    | 114 |
| 315  | 35.1 | 2    | 0    | 89578 | 89725 | C | L2         | LINE/L2         | -1153 | 2266 | 2116 | 115 |
| 610  | 33.8 | 5.6  | 4.9  | 89844 | 90441 | + | L2b        | LINE/L2         | 2772  | 3373 | -2   | 116 |
| 401  | 32   | 4.4  | 1.3  | 94470 | 94697 | C | L3         | LINE/CR1        | -8    | 4091 | 3857 | 117 |
| 886  | 32.7 | 6.3  | 2.5  | 94707 | 95315 | C | CR1-3_Croc | LINE/CR1        | -299  | 3274 | 2384 | 118 |
| 344  | 29.2 | 8.8  | 5.7  | 95334 | 95703 | + | L2d        | LINE/L2         | 3043  | 3419 | -7   | 119 |

### 3. RepeatMasker alignments from the THOLE locus as discussed in the manuscript

THOLE exons have been highlighted red.

#### A) RepeatMasker alignments of the LTR8/HUERS-P1 region

5025 9.56 1.60 0.87 NC\_000001.11:109831234-109931057 73 518 (99306) LTR8#LTR/ERV1 1  
453 (238) c\_b1s401i0 1

```

NC_000001.11:      73 TGAAACCGCCTTTGCAAAATTATGACTGAGACAGTGAAAGAGATCTAACC 122
                    i                               i
LTR8#LTR/ERV1      1 TGAAACCGCCTTTGCAAAATTATAACTGAGACAGTGAAAGAGATCTGACC 50

NC_000001.11:     123 TTAGTACTGACTCCATCTTGCTTCTAGCCTCAAAGCTGCCCTTGTTAGG---CT 169
                    v i i v i vvi---
LTR8#LTR/ERV1      51 TAACCGACTCCATCTTGCTTCTAACCTCCAAGCTGTCCTTGTTTATTTCCT 100

NC_000001.11:     170 GGGTGTACGCTGAACTAATTTGGGGGAAACTTAGTTTATAGTTTA---- 215
                    i v i i v i i -----
LTR8#LTR/ERV1      101 GGGCGTAGGCCGAACCTAAGCTTTGGGAGGAACTTAGTTTATAGTTTANANT 150

NC_000001.11:     216 ---AATAAAGATGGTAACAGCCCTTTCCCAAAGCAGGCCTCCTTCTTGCC 262
                    --- i i i i i i i i
LTR8#LTR/ERV1      151 TTAAACAAAGACGATAACAGCCCTTTCCCAAACAAACCCCTTCTTGCC 200

NC_000001.11:     263 TGGGGACTAGATTGCCTTTGTAGGACTAACATTACCTGCAAGATTAGAAA 312
                    i v i i
LTR8#LTR/ERV1      201 TGGGGACTAGACTGCCTTTGTAGGACTAACATTAGCCACAAGATTAGAAA 250

NC_000001.11:     313 TTATGGTTT TAGGAGTCATGCAGCTGGAGACTTCAAGATTCCGATCCTCCC 362
                    i v i i
LTR8#LTR/ERV1      251 TTATGGTTT TAGGAGTCATGCAGCTGGAGGCTACAAGATTCTGACCCTCCC 300

NC_000001.11:     363 TAAACTGCTCCTAAGATCATTGCTTGAGATATTTTGTAGACCCTGCCTT 412
                    i v i i
LTR8#LTR/ERV1      301 CAAACTGCTCCTAAGATCAGTGCTTGAGATATTTTGCAGACCCTGCACTT 350

NC_000001.11:     413 GATGAATCAGCTGGCACCACCCAGATCAGTAAACTGGTTTCATCTGATCTT 462
                    i i i
LTR8#LTR/ERV1      351 GATGGATCAGCTGGCACCACCCAGATCGATAAACTGGCTCATCTGATCTT 400

NC_000001.11:     463 GTAGCCCCACCCAGGAAGTACTCAGTGAAGAAGACAGGTCCGACTCC 512
                    i i v i
LTR8#LTR/ERV1      401 GTGGCCCCACCCAGGAAGTACTCAGCGCAAGAAGACAGGTCCGACTCC 450

NC_000001.11:     513 CTATTA 518
                    ---
LTR8#LTR/ERV1      451 CTA--- 453

```

2211 11.65 0.97 0.32 NC\_000001.11:109831234-109931057 519 828 (98996) C  
AluSx#SINE/Alu (0) 312 1 c\_b1s352i0 2

```

NC_000001.11:      519 TTTCTTTCTTTCTTTCTTTTCTTTTCTTTTGTAGACAGGGTCTCACACTGT 568
                    i i i i i i i i i v
C AluSx#SINE/Alu  312 TTTTTTTTTTTTTTTTTTTTTTTTTTTTTTTGAGACGGAGTCTCGCTCTGT 263

NC_000001.11:      569 TGGCCAGGCTGGAGTGCAGTGGTGCAGTCTTGCTCACTGCAACCTCCAC 618
                    i v i i i
C AluSx#SINE/Alu  262 CGCCAGGCTGGAGTGCAGTGGCGCGATCTCGGCTCACTGCAACCTCCGC 213

```

NC\_000001.11: 619 CT-CCATATTC AAGCGATTCTCCTGCCTCAGCCTCCCGAGTAGCTGGGAT 667  
 - i v i  
 C AluSx#SINE/Al 212 CTCCCGGGTTCAAGCGATTCTCCTGCCTCAGCCTCCCGAGTAGCTGGGAT 163  
 NC\_000001.11: 668 TACAGGTGGCTGCCACCACGCCCGGCTAAGTTTTATTATTTTAAATAAAG 717  
 i v v i v i - i i  
 C AluSx#SINE/Al 162 TACAGGCGCGGCCACCACGCCCGGCTAATTTTTG-TATTTT TAGTAGAG 114  
 NC\_000001.11: 718 ATGGGGTTTCACTATGTTGGCCAGGCTGGTCTTGAACCTCCTGACCTC--G 765  
 i i i i i --  
 C AluSx#SINE/Al 113 ACGGGGTTTACCATGTTGGCCAGGCTGGTCTCGAACTCCTGACCTCAGG 64  
 NC\_000001.11: 766 TGATCCACCTGCCTCAGCCTCCCAAAGTGCTGGGATTATAGTGTGGGGCC 815  
 i i i i i i i  
 C AluSx#SINE/Al 63 TGATCCGCCCGCTCGGCCTCCCAAAGTGCTGGGATTACAGGCGTGAGCC 14  
 NC\_000001.11: 816 ACTGCACCTGGCC 828  
 i i i  
 C AluSx#SINE/Al 13 ACCGCGCCCGGCC 1

5025 9.56 1.60 0.87 NC\_000001.11:109831234-109931057 829 1067 (98757) LTR8#LTR/ERV1  
 454 691 (0) c\_b1s401i0 1

NC\_000001.11: 829 TGTAATTTTCATCTCTGACCAATCAGCACTCCTGGCTCACTGGCTTCCCCT 878  
 -- i i i  
 LTR8#LTR/ERV1 454 --TGATTTTCATCTCTGACCAATCAGCACTCCCGACTCACTGGCTTCCCC 501  
 NC\_000001.11: 879 CACCCACCAAGTTATCTTAAAACTCTGCTCCCTGAATGCTCAGGGAGA 928  
 i i v i i  
 LTR8#LTR/ERV1 502 TACCCACCAAATTATCTTAAAACTCTGATCCCGAATGCTCGGGGAGA 551  
 NC\_000001.11: 929 CTGATTTGAGTAATAATAAAAACTCCCGTCTGCAGCACAG-CAGCTCTGCA 977  
 v v v - i i  
 LTR8#LTR/ERV1 552 CTGATTTGAGTAATAATAAAAACTCCGGTCTCCCGCACAGCCGGCTCTGCG 601  
 NC\_000001.11: 978 TGAATTACTCTTTCACTGTTGCAATTCCTGTCTCAATGAATCAGCTCT 1027  
 v i i i i  
 LTR8#LTR/ERV1 602 TGAATTACTCTTTCTCTATTGCAATTCCTGTCTTGATAAATCGGCTCT 651  
 NC\_000001.11: 1028 GTCTAGGCAGCGGGCAAGGTGAACCCCTGGGCGGTTACA 1067  
 v  
 LTR8#LTR/ERV1 652 GTCTAGGCAGCGGGCAAGGTGAACCCGTTGGGCGGTTACA 691

36461 7.40 2.15 0.57 NC\_000001.11:109831234-109931057 1068 2623 (97201) HUERS-  
 P1#LTR/ERV1 1 1624 (4639) m\_b1s701i0 1

NC\_000001.11: 1068 AATTTGGGGGCTCGTCTGGGATTGCCCTTGTGGCTACTTGCCCATGGTTTC 1117  
 i i i  
 HUERS-P1#LTR/ 1 AATTTGGGGGCTCGTCCGGGATTGCCCTTGTGGCTACTTGCCCGTGGTTTC 50  
 NC\_000001.11: 1118 AGTGGCCTCCTCCCCAGCGATGAATCCAGAAGTCAGCCCAAGCGGCAGC 1167  
 i i i -- i i i i i v  
 HUERS-P1#LTR/ 51 GGTAGCCCC--CTCCGGCGATGGATCCAGAGGCCAGCCCAAGCGGCCGC 98  
 NC\_000001.11: 1168 CTGGTTCTCTTGGACTGGGGCTGACTCTGGTATT-TCTCTACTGGCAGG 1216  
 i i - i  
 HUERS-P1#LTR/ 99 CTAGTTCTCTTGGACTGGGGCTGACTCTGGTACTCTCTCTACTGGCGGG 148  
 NC\_000001.11: 1217 GCACTGCCGACCCGATGTGCATGGATTTAATTGCAGTGGAGAAAAGAGTCC 1266  
 i i i i v  
 HUERS-P1#LTR/ 149 GCGCTGCCGACCCAATGTGCATGGATTTAATTGCAATGGAGAAAATAGTCC 198  
 NC\_000001.11: 1267 TAGGGAGACACCACTTAATTGTAGCCCTATCACAGGGCGTCTGTCTGTAG 1316  
 i i i v ? i i  
 HUERS-P1#LTR/ 199 TGGGGAGACGTCCNCTAAGTGTAGCCCTATCACAGGGTGTCTGTCTGTAG 248

NC\_000001.11: 1317 CCCCATGGTGGGA----TGCTGTAGCCCCATTGTGGGCTGTCTGGATTG 1362  
i----- i v  
HUERS-P1#LTR/ 249 CCCCATGGTGGGGTGTCTGTCTGTAGCCCCATTGCGGGGTGTCTGGATTG 298

NC\_000001.11: 1363 GTAAGTATCCTAGGCACTGCCAATGGCTTCTTCCTTCTCCTGACTGGTTA 1412  
i i i v i i -  
HUERS-P1#LTR/ 299 GTGAGTATCCTAGGCGCTGCCAACGCCTCCTTCCTTCTCCCGACTGGTT- 347

NC\_000001.11: 1413 TGTAGCCCTATGGTGGTGTGTCTGTAGCACCATTGCAGGGTGTCTGTT-- 1460  
v v i --  
HUERS-P1#LTR/ 348 TGTAGCCCTATGGTGGGGTGTCTGTAGCCCCATTGCGGGGTGTCTGTTT 397

NC\_000001.11: 1461 CAGCTC--CTGTGGGG-GTCTCAGT---TGGCTC--TTTC----TAACTA 1498  
i -- ii - vv --- i i -- v ---- iv i  
HUERS-P1#LTR/ 398 TAGCTCCACCATGGGGTGTCTGTGTCTGTAGCCCCATTGCGGGGTGTCTG 447

NC\_000001.11: 1499 GTCACACAGCTCC--GAAGGT-----CTAATAGGAA 1527  
v --ii -- ii ----- i  
HUERS-P1#LTR/ 448 TT--TGCAGCTCCTGGGGGTCTCGGTTGGCTCTCCCTAACTAGTAGGAA 495

NC\_000001.11: 1528 GAGTCTGGTTTGGGAGACTTGTCTTCAATCAGGAAGATTCGAGGAGTT 1577  
i i v i i v  
HUERS-P1#LTR/ 496 GAGTCTTGGTTCGGGAGACTTCTCCTCAATCAGGAAGATTCGAGGAGTT 545

NC\_000001.11: 1578 TTCTCAGAAGGAGACTAGGAGAATAGTTTGGGAGGGATACTCTTGGAGTT 1627  
v v i i  
HUERS-P1#LTR/ 546 TTCTCAGACGGAGAATAGGAGGATAGTTTGGGAGGGATACTCTTGGAGTT 595

NC\_000001.11: 1628 CTTGGTTAGGGATCTGATTTAGAAGGCCTTCT-----GTCTTTGCA 1668  
i ----- ii  
HUERS-P1#LTR/ 596 CTTGGTTAGGGATCTGATTTGGAAGGCCTTCTGTCCGTCTCGTCTTTGTG 645

NC\_000001.11: 1669 TGTGTTTCGTATATTTGGAAGGAATCTCAGAGAGG--TTGCTGATGGAAGT 1716  
i v i i ? - --  
HUERS-P1#LTR/ 646 TGTGTTTGTATATGTGGAGGGGATCTCNGA-AGGAATTGCTGATGGAAGT 694

NC\_000001.11: 1717 CCAGCAGGCCTAACTCAGAGAACCCTCCTTATTTGTCTGGTCACATTTCGA 1766  
i  
HUERS-P1#LTR/ 695 CCAGCAGGCCTAACTCAGAGAACCCTCCTTATTTGTCTGGTCACATTTCGG 744

NC\_000001.11: 1767 TGAGCTCTAAAGAAGGCTCAACAGGCCTGTCTCAGGGGGTGAATATCTGC 1816  
i i i ? -- v i  
HUERS-P1#LTR/ 745 TGAGCCCTGAAGAAAGCTCAACAGGCCTGNCTC--GGGGTACTATCCGC 792

NC\_000001.11: 1817 TCTTCCCATTTGCTCAGATACCCGTTGTGAATTACCATTTGGAGGTAGTC 1866  
v v i v i i i vi  
HUERS-P1#LTR/ 793 TCTTCGCCCTTGCCAGAGACCCCATTTGTGAATTACCCTTCGGAGGTCATC 842

NC\_000001.11: 1867 CGTCCCCACCTGGAGTGGATCAAAGACAACAGAGGCCAACGGGGAAAAAAG 1916  
v i i -  
HUERS-P1#LTR/ 843 CCTCCCCACCTGGAGTGGATCAAAGACAACAGGGACCAAC-GGGAAAAAAG 891

NC\_000001.11: 1917 TTTGAGCTTTGCCAGGCTGATATTGGCTGCTGAATAAGGTGACTAATGTC 1966  
ii v ii i  
HUERS-P1#LTR/ 892 TTTGAGCTTTGCCAGGCTGATATTGGGTGCTGAACGAGGTGACTAGTGTC 941

NC\_000001.11: 1967 TGTTTTGTATGTGTATTTTGTCTGGGATGGAAAATGTTAATTTGGTTTCC 2016  
i i  
HUERS-P1#LTR/ 942 TGTTTTGTATGTGTATTTTGTCTGGGATGGAAAATGTTAATTCGGTTCCC 991

NC\_000001.11: 2017 CATGCAGCCCGTCAGGCAGCATCTTGCAAATAAAGAATCTTGTC-----T 2061  
ii vi i ----  
HUERS-P1#LTR/ 992 CATGCAGCCCGTTGGGCAGCATCTTGCAAATGAGAATCTTGCCATAGGT 1041

NC\_000001.11: 2062 TAC-----AGGGTGAATTTCTCTTGTAATAAGGCTTGAACCCC 2099  
v ----- i i ?  
HUERS-P1#LTR/ 1042 TCCATAAAACAGAAAAGGGTGAATTTCTTTTGTAAAGTGGCTTGANCCCC 1091

NC\_000001.11: 2100 AAAGCTATAGCACAAAGCAAGCAGGGTCATCAGAAGCCACTCCATTCTTCT 2149  
v i i ? i i i  
HUERS-P1#LTR/ 1092 ACAGCTATGGCGCANGCGAGCAGGGTCATCAGAAGCCGCTCCGTTCTTCT 1141  
NC\_000001.11: 2150 GGAAGCTGCAGGGAAATGGAACCCAGAAACCAGGTATGACAGCAAAAAGG 2199  
i v i v v i  
HUERS-P1#LTR/ 1142 GGAAGCTGCAGAGAAAGGGAACCCGGAACCTGGTATGCCGGCAAAAAGG 1191  
NC\_000001.11: 2200 GTAAAAAATTCTTACCGGCCAAGTTTCTGA----TCTGTCTTGCTTTTCTC 2245  
i i i---- v iv  
HUERS-P1#LTR/ 1192 GTAAGAAATCTTACCAGCCAAGTTTCTGGTCTCTCTCTCTCTTTTCTC 1241  
NC\_000001.11: 2246 TGTCTGAAT-AAACGGTAAACTATTTGTCTCCTCTGCAAGGGTTTGATTA 2294  
?i -  
HUERS-P1#LTR/ 1242 TGTCTGNGTAAAAACGGTAAACTATTTGTCTCCTCTGCAAGGGTTTGATTA 1291  
NC\_000001.11: 2295 ACAGAAAAAAGGATTTGTGAGACTAGTCTTAAGCTGTAA-AAATCTGGTG 2343  
i i i-  
HUERS-P1#LTR/ 1292 ATAGAAAAAAGGATTTGTGAGACTAGTCTTAGGCTGTAGCAAAATCTGGTG 1341  
NC\_000001.11: 2344 TGCTTTGTGCTAAGAATTTGTCTTTCTGTGTCTGTAATGGAGAGAGGGG 2393  
i  
HUERS-P1#LTR/ 1342 TACTTTGTGCTAAGAATTTGTCTTTCTGTGTCTGTAATGGAGAGAGGGG 1391  
NC\_000001.11: 2394 TATCACAGGATAGAACATGGGTTTAGGACCCC--TAAGCCTGCTTTTAAA 2441  
i -- i v  
HUERS-P1#LTR/ 1392 TATCACAGGATAGAACGTGGGTTTAGGACCCCTATAAGCCCGCTTTTCAA 1441  
NC\_000001.11: 2442 GTCAGCTTGGCAGGCTGGTCAGTTATAAACTTTGCTATGGGTCCCTGAAA 2491  
i ii i ii  
HUERS-P1#LTR/ 1442 GCCAGCCCGGCAGGCTGGTCAGTTACAACTTTGCTGCGGGTCCCTGAAA 1491  
NC\_000001.11: 2492 CCAATACGGTATGAAATTTCTCTGTTTTGTTTTGTGTCCTTAAGAGTTTA 2541  
v v i i  
HUERS-P1#LTR/ 1492 CCAATACCGGATGAAATTTCTCTGTCTTGTGTTTTGTGTCCTTAAGAGCTTA 1541  
NC\_000001.11: 2542 ACCTTATGACCATG-GGAGATACTTTCTTTTGGTTTCTACCACCCAGACG 2590  
i - i i ii i v  
HUERS-P1#LTR/ 1542 ACCTTGTGACCATGTGGGATACTTTCTCTTGGTTTCCGCCATCCAGAGG 1591  
NC\_000001.11: 2591 ACAGGAATTTTGGGGTTCATGTCATAATCCTAA-- 2623  
i -- i--  
HUERS-P1#LTR/ 1592 ACAGGAATTTTGGGGTTCATGTCATAGT--TAGCC 1624

1655 11.74 11.19 1.65 NC\_000001.11:109831234-109931057 2624 2900 (96924) C  
AluSx#SINE/Alu (9) 303 1<sup>-</sup>c\_b1s352i1 3

NC\_000001.11: 2624 TTTTTTTTTTTTTTTTTTTTTTGGAGATGGAGTCTTGCTCCCATACGAGGG 2673  
i i i-i ii vvi  
C AluSx#SINE/Alu 303 TTTTTTTTTTTTTTTTTTTTGGAGACGGAGTCTCGCTCT-GTCGCCAGG 255  
NC\_000001.11: 2674 CTGGAGTGCAGTGGTGCAATCTCAGCTGAATGCAACCTCTGCCTCCCGGG 2723  
i i i v v i  
C AluSx#SINE/Alu 254 CTGGAGTGCAGTGGCGGATCTCGGCTCACTGCAACCTCCGCTCCCGGG 205  
NC\_000001.11: 2724 -----GGTATTCCTTCTCAGCCTCCCAGCAGCTGGGATTACA---- 2762  
----- i vi v v i -----  
C AluSx#SINE/Alu 204 TTCAAGCGATTCTCCTGCCTCAGCCTCCCAGTAGCTGGGATTACAGGCG 155  
NC\_000001.11: 2763 -----ATTTTTGTATTTTTAGTAGAGACAGTGTTT 2792  
----- i v  
C AluSx#SINE/Alu 154 CGCGCCACCACGCCCGGCTAATTTTTGTATTTTTAGTAGAGACGGGGTTT 105  
NC\_000001.11: 2793 CACCATGTTGGCCAGGCCGGTATCGAACTCCTGACCTCAAGTGATCCACC 2842  
i v i i  
C AluSx#SINE/Alu 104 CACCATGTTGGCCAGGCTGGTCTCGAACTCCTGACCTCAGGTGATCCGCC 55

NC\_000001.11: 2843 CGCCTCAGCCTCCCAAAGTGCTAGGATTACAGACAGGCGTGAGCCACTGT 2892  
 C AluSx#SINE/Al 54 CGCCTCGGCCTCCCAAAGTGCTGGGATT----ACAGGCGTGAGCCACCGC 9  
 NC\_000001.11: 2893 GCCCAGCC 2900  
 C AluSx#SINE/Al 8 GCCCGGCC 1

36461 7.40 2.15 0.57 NC\_000001.11:109831234-109931057 2901 5645 (94179) HUERS-  
 P1#LTR/ERV1 1625 4368 (1895) m\_b1s701i0 1

NC\_000001.11: 2901 TAAAAATTTTTCTTGAGCAATTAAAAGCC--TTGCAAGCTTGAAATTGGCT 2949  
 HUERS-P1#LTR/ 1625 TAAAAATNTNCTTGAGCAGTTAAAAGCCTTTGCAAGCTTGAAATTGGCT 1674  
 NC\_000001.11: 2950 TCTCTAGGCTCCTTCTGGGAAAAGCAATAGGAAGCTTCTCAATGCTGTATA 2999  
 HUERS-P1#LTR/ 1675 NCTCTAGGCTCCTTCTGGGAAAAGCAATAGAAAAGCTGCTCAATGCTGTATA 1724  
 NC\_000001.11: 3000 GCTCGGTAGCTAAGGCTTTATCTTTTGACACTGGTGGCCTGGGTTCAATT 3049  
 HUERS-P1#LTR/ 1725 GCTCAGTAGCTAAGGCTTTGTCTTTTGACAATGGCGGCCCGGTTCAATT 1774  
 NC\_000001.11: 3050 GTTGGCTGCTGAAATGATTCATTTCTGGTTTGTATTGTGTAACGTTGC 3099  
 HUERS-P1#LTR/ 1775 CTTGGCTTCGGAATGATTCCTTTCTGGTTTGTATTGTGTAACGTTGC 1824  
 NC\_000001.11: 3100 CATTTATTGAGGTTTTTCCCATCGTAGATAGCTTCTGATTTCTCTCTT 3149  
 HUERS-P1#LTR/ 1825 CATTTATTGAGGTTTTCTCCCCCATGGATAGCTTCTGATTTCTCTCTT 1874  
 NC\_000001.11: 3150 GAATTTTCCTTCTCTGAACTACCTTGTGGAGATTCTAAATCTTATAAAA 3199  
 HUERS-P1#LTR/ 1875 GAATTTTCCTTCTCTGAACTACCTTGGGGAGATTCTAAATCTTGT--AA 1922  
 NC\_000001.11: 3200 AAAAGAACTGCTTACCATGCTTTGAAGCACCTAGGAGGTTACATTTGG 3249  
 HUERS-P1#LTR/ 1923 AAAAGAACTGCTTACCATNTCTTTGAAGCACCTGGGAGGTTACATTTGG 1972  
 NC\_000001.11: 3250 TAAAGTTCAGAAGCTAGAAGTATTGGCCACTTGGCATGGCTAAAGTCAGG 3299  
 HUERS-P1#LTR/ 1973 TAAAGTTCAAAAGCCAGAAATATTGGCCGCTTGGCATGGCTAAAGTCAGG 2022  
 NC\_000001.11: 3300 TAATAAGAGATTTGAAAAGATTTCTTTTTTAAAGAGCACTATGGTTAAAA 3349  
 HUERS-P1#LTR/ 2023 TAATAAGAGATTTAAAAGGATTTCTTTTTTAAAGAGCGCTATGGTTAAAA 2072  
 NC\_000001.11: 3350 GTTAGGTTAATTTAAAAGTGGATAAACAAGCTATAGATGTATTTAAAAGGC 3399  
 HUERS-P1#LTR/ 2073 GTCAGCTTAATTTAAAAGTGGATANNCAAGCTATAGGTATATTTAAAAGGC 2122  
 NC\_000001.11: 3400 CAT--TGTTTTCTCTTCTTGAAGCTTGTCTTTCTGGAAAAGGTTTTTTC 3447  
 HUERS-P1#LTR/ 2123 CTTTATGTTTTCTCTTCTTGGATCTTGTCTTTCTGGAAAAGGTTTTTTC 2172  
 NC\_000001.11: 3448 CTTCTAAGTCGACTGAACATTTTTCTCCATTTTTTGTCTTGCCACTCT 3497  
 HUERS-P1#LTR/ 2173 CTTCTCAGTCGACTGAATTTTTCTCCATTTTTTCTGCTTGCCACTCT 2222  
 NC\_000001.11: 3498 TAATACACACATCAGAGCCCTAAGATAACTTCTGGTAGCTTGGGACTCC 3547  
 HUERS-P1#LTR/ 2223 TAATGCACACATGAGAGGCCCTAAGATAACTTCTGGTAGCTTGGGACTCC 2272  
 NC\_000001.11: 3548 TTGGGAAAAACAGAGGAGGTGCTGCAGACCCCGCTTTGGGGAAAAAAACC 3597  
 HUERS-P1#LTR/ 2273 TTGGGAAAAACAGAGGAGGCCACAGACCCCGTTTTGGGGAAAAAANN 2322

NC\_000001.11: 3598 CAAAACACTCTGTTTTTCATCATGAAACCCCAGGAATTAATAGCGGATAGA 3647  
                   -----                  v      i                                  v  
 HUERS-P1#LTR/ 2323 C-----CTCTGTTTTTCCTCATGGAACCCCAGGAATTAAGCGGATAGA 2366  
  
 NC\_000001.11: 3648 TCCCTCTCAAATCAAAGGCT-TGTTCTGTTTTGCATTGTGTGTCTGAC 3696  
                                           ?      -                                  i  
 HUERS-P1#LTR/ 2367 TCCCTCTCAAATCNAAGGCTCTGTTCTGTTTTGCATTGTGTATCTGAC 2416  
  
 NC\_000001.11: 3697 GGTTTTGAGTTTGGGGGCATCAGAAATTACTTTGCATTATGAGAGAGCT 3746  
                                   v      i                                  i  
 HUERS-P1#LTR/ 2417 GGTTTTGAGTTTGGGGGTATCAGAAATTACTTCGCATTATGAGAGAGCT 2466  
  
 NC\_000001.11: 3747 TTGGTGTGTAATAACTAGGTAGGAAATATACTCTAAGGGATGGCTAATAG 3796  
                                                                                   i                  i  
 HUERS-P1#LTR/ 2467 TTGGTGTGTAATAACTAGGTAGGAAATATACTTTAAGGGATGGCTAATGG 2516  
  
 NC\_000001.11: 3797 TAGTTAGGGAGGGTACTTGACTCTTTGCACACTTGGATCAGAGAAGCAT 3846  
           i      v      i      i                                  i  
 HUERS-P1#LTR/ 2517 CAGTTATGGAGGGATACTTGACTCTTTGCACGCTTGGATCAGAGAAGCAT 2566  
  
 NC\_000001.11: 3847 GCTCTTGGCCACCTGGAAGATAAGGAGACATCCCCACCCCTGAGAG 3896  
                                                           v      i                                  i  
 HUERS-P1#LTR/ 2567 GCTCTTGGCCACCTGGAAGATATGGAACATCCCCACCCCTGAGAG 2616  
  
 NC\_000001.11: 3897 ATGAGACTCTCATGAGGGATGGGCTGATTGCAAAATGGGCTGATTGGCTT 3946  
                                   i      i                                  i  
 HUERS-P1#LTR/ 2617 ATGAGACTCCCATGGGGATGGGCTGATTACAAATGGGCTGATTGGCTT 2666  
  
 NC\_000001.11: 3947 TGGGTTGCCTTGAATGAAATGCAGGGTAGAAGCACTGCACTGTCTCTC 3996  
                                   i                                  ?                                  i  
 HUERS-P1#LTR/ 2667 TGGGTTGCCTTGAATGAAATGCANGGTAGAAGCACTGCACTGTCTCTC 2716  
  
 NC\_000001.11: 3997 CAGTAGTATTTCCCTCCTTTT-GGGATCCAGGAT-CAGTATAAAATGGCA 4044  
                   v                                  -                                  -i  
 HUERS-P1#LTR/ 2717 CCGTAGTATTTCCCTCCTTTTGGGGATCCAGGATCCGGTATAAAATGGCA 2766  
  
 NC\_000001.11: 4045 CCCTTAATTTTGGGGATGTGTCTCTGCCTTCAGCTGCTTATTTGCTGCTT 4094  
                                                           v      i                                  ??  ??  
 HUERS-P1#LTR/ 2767 CCCTTAATTTTGGGGATCTGTCTTTGCCTTCAGCTGNNTNNTTGCTGCTT 2816  
  
 NC\_000001.11: 4095 ATTTGGCCTTAGAAATGCATGCTTTCCAGGCCCTGTTCTCCAAGGGCTC 4144  
                   v      i                                  v  
 HUERS-P1#LTR/ 2817 ATTAGGCCCTAGAAATGCATGCTTTCTGGCCCTGTTCTCCAAGGGCTC 2866  
  
 NC\_000001.11: 4145 CACCCGAAGCCAGTAATCCAATTAAGAACTGGCAAATGAAAAACCTTA 4194  
                                   i                                                          i  
 HUERS-P1#LTR/ 2867 CACCTGAAGCCAGTAATCCAATTAAGAACTGGCAAATGAAAAATCTTA 2916  
  
 NC\_000001.11: 4195 CAAGTGCCTAATCTTC--TCTCTGTATATTTATATGTGTGTATGTTTAT 4242  
                                   ?  iv      --  v  i                                  v  
 HUERS-P1#LTR/ 2917 CAANTGCTGAATCTTCTGTCTGTGTATTTATATGTGTGTATGTTTAT 2966  
  
 NC\_000001.11: 4243 ATATAAAAGAGCTCTGATTAATTGGCTTAGAAAAATAAGCGCTTAAATCA 4292  
 HUERS-P1#LTR/ 2967 ATATAAAAGAGCTCTGATTAATTGGCTTAGAAAAATAAGCGCTTAAATCA 3016  
  
 NC\_000001.11: 4293 AATATTTTGTGAGAAAAATAGAAATTTTAAATGCCTTTTTT-TTCTCGTCAT 4341  
                                                           i                                  ?-  v  v  i  
 HUERS-P1#LTR/ 3017 AATATTTTGTGAGAAAAATAGAACTTTAATGCCTTTTTNGTTCACGTGAC 3066  
  
 NC\_000001.11: 4342 TTTAGTAATCTTTTGGAAATAAAGACAGTTTAAAGATTATGGTAAAAT 4391  
 HUERS-P1#LTR/ 3067 TTTAGTAATCTTTTGGAAATAAAGACAGTTTAAAGATTATGGTAAAAT 3116  
  
 NC\_000001.11: 4392 AAAATGTCTTGAAAATGTAGACATTTGGTCTAAATTAAGATCAGGTATCA 4441  
                                   v      ?                                  i      i  
 HUERS-P1#LTR/ 3117 AAAATGTCTTCAAATNTAGACATTTGGTCTAAATTAAGTTCAGATATCA 3166



NC\_000001.11: 4442 GACTTGCTAAATATTTTAAAGTTCAAACTGTTTCTTTGACTTTTGAAAATT 4491  
                   ii                  ii          v          i  
 HUERS-P1#LTR/ 3167 GGTTTGCTAAATGCTTTTAAAGTTCAAACTGCTTCTTTGACTTTTGAAAATT 3216  
  
 NC\_000001.11: 4492 GTTCGATTTACCTACTTTGGAGCATTAGATTATAGATAATTCCTGCGGAC 4541  
                   i                                          v          vv          v  
 HUERS-P1#LTR/ 3217 GTTCAATTTACCTACTTTGGAGCATTAGATTCTAGATAAAGCCTGGGGAC 3266  
  
 NC\_000001.11: 4542 ATGGGGAGAGCCATGTCCGCTAGCTATGCTAAAAGGAGTCAGACCTTATC 4591  
                   v                  i  v                  i  i  
 HUERS-P1#LTR/ 3267 ATGTGGAGAGCCATGCCCCCTAGCTATGCTGAAAAGAGTCAGACCTTATC 3316  
  
 NC\_000001.11: 4592 TTCATTTCTGTCTGATGTCCTAGGCTCCACCCCTAGTACATAATTTAAAAT 4641  
                   ?  i                                          ?  
 HUERS-P1#LTR/ 3317 TNCACCTTCTGTCTGATGTCCTAGGCTCCACNCCTAGTACATAATTTAAAAT 3366  
  
 NC\_000001.11: 4642 CGCTTACTTGTCTAGGTTTTTCACTAAAAATAAAAGGTGCTAAGAGTTAAC 4691  
                                   i                  i                  v  
 HUERS-P1#LTR/ 3367 CGCTTACTTATCAGGTTTTTCAACAAAAATAAAAGTTGCTAAGAGTTAAC 3416  
  
 NC\_000001.11: 4692 ATTGCAACATGTAGTCGAGACCCTGGAGAACAGTTTTACATACAAGGT 4741  
                   i                  i  i          ii  
 HUERS-P1#LTR/ 3417 ATTGTAACATGTAATTGAGACTACTGGAGAACAGTTTTACATACAAGGT 3466  
  
 NC\_000001.11: 4742 GTGTAGGGAATGTGTTTTTAGGTAAAAGATTATAAGAAGGCATGGGAATAT 4791  
                                                           v  
 HUERS-P1#LTR/ 3467 GTGTAGGGAATGTGTTTTTAGGTAAAAGATTATAAGAAGGCATGGGAATAT 3516  
  
 NC\_000001.11: 4792 GGCTTTTGTAAAGGGAATGTAATTTTGTCTAGTTCAGAGGGTTTTAAAG 4841  
 HUERS-P1#LTR/ 3517 GGCTTTTGTAAAGGGAATGTAATTTTGTCTAGTTCAGAGGGTTTTAAAG 3566  
  
 NC\_000001.11: 4842 ATTGTCTTAACCTAAAAGAGTAATGGAACAAAAGTGAAGTTTAAGCAAA 4891  
                                                           i                  i  
 HUERS-P1#LTR/ 3567 ATTGTCTTAACCTAAAAGAGTAATGGGACAAAAGTGAAGTTTAAGCAAG 3616  
  
 NC\_000001.11: 4892 GTGAAAAGGTTTGTAAAAGGTTGATCTTGT---AAAACCTCTGTGGGTA 4938  
                   ?                  vi                  ---          v  
 HUERS-P1#LTR/ 3617 NTGAAAAGGTTTGTGAAGGTTGATCTTGTAAAAAAGTTCTGTGGGTA 3666  
  
 NC\_000001.11: 4939 TAAACAAGTTGGCTAAGATTTAAAAGAAATTATTTAGC-TTTTCCCCATA 4987  
                   i                                  i  i  ii          -          ii  i  
 HUERS-P1#LTR/ 3667 TGAACAAGTTGGCTAAGATTTGAAGGGGATTATTTAGCTTTTTTTCCGTA 3716  
  
 NC\_000001.11: 4988 GGTAAAACATTTAAAATCATACTGATGTGGGGCCAGAATCTGGGCCATG 5037  
                                                           i          i  
 HUERS-P1#LTR/ 3717 GGTAAAACATTTAAAATCACACTGATGCGGGGCCAGAATCTGGGCCATG 3766  
  
 NC\_000001.11: 5038 TGTACGAATAACAGGGTTTTCTTAGAAAATTGATCTGCTGTTTATGATGGAA 5087  
                   v                                                          i  i  
 HUERS-P1#LTR/ 3767 TGTCCGAATAACAGGGTTTTCTTAGAAAATTGATCTGCTGTTTAAACGGAA 3816  
  
 NC\_000001.11: 5088 AATTGTAAAGGTTCTAAAAAGTTTATGAAAATCTTGCCCTATGGTGAAG 5137  
                                                                                   i          v  
 HUERS-P1#LTR/ 3817 AATTGTAAAGGTTCTAAAAAGTTTATGAAAATCTTACCTTATGGTCAAA 3866  
  
 NC\_000001.11: 5138 CTAATTTAAAAGTGGATAGAGATATAAAATTTTATCTAAAAAAGTACTTT 5187  
                                                           vv                  i  -  
 HUERS-P1#LTR/ 3867 CTAATTTAAAAGTGGATAGATTTATAAAATTTTATTT-AAAAAGTACTTT 3915  
  
 NC\_000001.11: 5188 AACGTTAAAAGATGCACTAATGCAACAAGAAATTTGGTTTTCTCTTTTG 5237  
                   i  -                                          v  
 HUERS-P1#LTR/ 3916 AACATT-AAAGATGCACTAATGCAACAAGAAATTTGGTTTTCTCTTTTG 3964  
  
 NC\_000001.11: 5238 AAGATGATTTTATGTAATGTTAAAAGATAATGAAAGGTTTGTGTTTCT 5287  
                   ?                  i                  ?          i  
 HUERS-P1#LTR/ 3965 AAGANGATTTTATGTAATTTAAAAGATAATGAAAGGTTTTGTGTTTCC 4014

NC\_000001.11: 5288 CCTTTGGGTAAATGGCAGGGAAAAAAGAGGAGAGAGATAAGAGACAGA 5337  
 HUERS-P1#LTR/ 4015 CCTTTGGGTAAACGGCAGGGAAAAAAGGGAGAGAGAGAGAAGAGACAGA 4064  
 NC\_000001.11: 5338 TTGAGTTGGCCTCATGCTATCTTCATTGGGTCTTGTTTGGAAAGCTAAGT 5387  
 HUERS-P1#LTR/ 4065 TTCAGTTGGCCTCATGCTATCTTCATTGGGTCTTGTTTGGAAAGCTAAGT 4114  
 NC\_000001.11: 5388 CTTCTCTATCAGAGTGAAGGTTTTCTTTTTAAAAATTGTTTGGAGTT 5437  
 HUERS-P1#LTR/ 4115 CTCCTCTATCAGAGTAAAGGTTTTCTTTTTAAAAANATTTTTGGAGTT 4164  
 NC\_000001.11: 5438 ATCAATTCGGCCAAATGAATGATTTACGGTGATCTGGGA-TCTATTTTGT 5486  
 HUERS-P1#LTR/ 4165 ATCATTTTGGCCAAATGAATGACTTATGGTGACCTGGGATTCTATTTTGT 4214  
 NC\_000001.11: 5487 GATATCCTGTGTTTTAAACCTTTGATATTTGACAAGCTTTCCAATATCAA 5536  
 HUERS-P1#LTR/ 4215 GATATCCAGTGTTTTTAAACCTTTGATATTTGACAAACTTTCCAAAATCAA 4264  
 NC\_000001.11: 5537 ATTATAAATTCTGTCTCTTTCTAACCTAATATTTAGATATTAGGTCTT 5586  
 HUERS-P1#LTR/ 4265 ATTATAAATTATGTCTCTTTCTGACCTAATNTTTTAGATATTAGGTCCTC 4314  
 NC\_000001.11: 5587 TAAAGTCCAAAAATGACATTTGGCTTATTTGGTACAAAAATCACACAGGA 5636  
 HUERS-P1#LTR/ 4315 TAAAGTCCAAAAATGACATTTGGCTTATTTGGTATAAAAAATCATAACAGGA 4364  
 NC\_000001.11: 5637 AGCATTGTC 5645  
 HUERS-P1#LTR/ 4365 AGCA----- 4368

3466 4.17 7.41 0.00 NC\_000001.11:109831234-109931057 5646 6077 (93747) C  
 LTR7B#LTR/ERV1 (0) 464 1 c\_b1s401i1 4

NC\_000001.11: 5646 TGTCTCATGCGTCCATGTGAACAGACCACCAAACAGGCTTTGTGTGAGCA 5695  
 C LTR7B#LTR/ERV 464 TGTCACGCGCGTCCGTGTGAAGAGACCACCAAACAGGCTTTGTGTGAGCA 415  
 NC\_000001.11: 5696 ACAAGGCTGTTTATTTACCTGGGCGCAGGCGGTCTGAGTCTGAAAAGAG 5745  
 C LTR7B#LTR/ERV 414 ACAAGGCTGTTTATTTACCTGGGTGCAGGCGGCTGAGTCCGAAAAGAG 365  
 NC\_000001.11: 5746 AGTCAGCGAAGGGTGGTGGGATTATCGTTAGTTCTTATAGGTTTGGGAT 5795  
 C LTR7B#LTR/ERV 364 AGTCAGCAAAGGGTGGTGGGATTATCATTAGTTCTTATAGGTTTGGGAT 315  
 NC\_000001.11: 5796 AGGCGGTGGAGTTAGGAGCAATGTTTTTCGGGCAGGGGTGGATCTCACA 5845  
 C LTR7B#LTR/ERV 314 AGGCGGTGGAGTTAGGAGCAATGTTTTGCGGCAGGGGTGGATCTCACA 265  
 NC\_000001.11: 5846 AAGTAAGTTCTCAAGGGTGGGAGAATTACAAAGAACCTTCCTAA----- 5890  
 C LTR7B#LTR/ERV 264 AAGTACATTCTCAAGGGTGGGAGAATTACAAAGAACCTTCCTAAGGGTG 215  
 NC\_000001.11: 5891 -----GGTGGGGAAATTACAAAGTACG 5913  
 C LTR7B#LTR/ERV 214 GGGGAGATTACAAAGNACCTTCTTAAGGGTGGGGAGATTACAAAGTACA 165  
 NC\_000001.11: 5914 TTGATCACTTAGGGTGGGGCAGAAACAAATCACAATGGTGAATGTCATC 5963  
 C LTR7B#LTR/ERV 164 TTGATCAGTTAGGGTGGGGCAGAAACAAATCACAATGGTGAATGTCATC 115  
 NC\_000001.11: 5964 AGTTAAGGCTATTTTCACTTCTTTTGTGGATCTTCAGTTGCTTCAGGCCA 6013  
 C LTR7B#LTR/ERV 114 AGTTAAGGCTATTTTCACTTCTTTTGTGGATCTTCAGTTGCTTCAGGCCA 65

NC\_000001.11: 6014 TCTGGATGTATACGTGCAGGTCACAGGGCATATGATGGCTTAGCTTGGGC 6063  
 C LTR7B#LTR/ERV 64 TCTGGATGTATACGTGCAGGTCACAGGGGATATGATGGCTTAGCTTGGGC 15  
 NC\_000001.11: 6064 TCAGAGGCCTGACA 6077  
 C LTR7B#LTR/ERV 14 TCAGAGGCCTGACA 1

36461 7.40 2.15 0.57 NC\_000001.11:109831234-109931057 6078 6650 (93174) HUERS-  
 P1#LTR/ERV1 4369 4952 (1311) m\_b1s701i0 1

NC\_000001.11: 6078 TTGTCAAATATGAAATGGTGTGGCTTTCTTTGGTCTCTATTTGTGTAA 6127  
 HUERS-P1#LTR/ 4369 TTGTCAAATATGAAATGGTGTGGCTTTCTTTGGGCTATATTTGTGTAA 4418  
 NC\_000001.11: 6128 ATGTGTTATGGTATATGTTCTGAAGTAATGTAAACTCCTATAATTCTA 6177  
 HUERS-P1#LTR/ 4419 ATGTGTTATGGTATATGTTCCAAAATTATGTAAACTCCTATAATTCTA 4468  
 NC\_000001.11: 6178 ATATGACTTAGTCTATGTTATCTGTAATAATTATAATTATTATGTTAACA 6227  
 HUERS-P1#LTR/ 4469 ATATGACTTAGTATATGTTATCAGTAATAATTATAATTATTATGTTAAAT 4518  
 NC\_000001.11: 6228 GACTGTGTGCTACAAAGGT---AAATTCCTTGTCAATTGTGTCTTTAAC 6274  
 HUERS-P1#LTR/ 4519 NACTGTGTGCCACAGAGGTAACAAATTCCTTGTCAATTGTGTCTTTAAC 4568  
 NC\_000001.11: 6275 TGTGGCTGCCCTAAAATGTTTTGTGCATCCACAGATAATTGCTGTCTCGT 6324  
 HUERS-P1#LTR/ 4569 TGTGGCTGCCCTAAAATGTTTTGTGCATCCACAGACAATTGTTGTCTCGT 4618  
 NC\_000001.11: 6325 TTTGGTCTCTTTAAAAGATGGTTTTATAATCAGTTTTAAAATGTAACAG 6374  
 HUERS-P1#LTR/ 4619 TTTGGTCTCTTTAAAAGATGGTTTTATAATCAGCTATAAAATTTAACAG 4668  
 NC\_000001.11: 6375 GTGCTCTTAAATGCAGGATTCTGATAAATACTCTGGAGATTGTGACATT 6424  
 HUERS-P1#LTR/ 4669 GTGCTCTTAAATGCAGGTTTCTGATTAATAACT-TGGAGATTGTGACATT 4717  
 NC\_000001.11: 6425 TGAATAGAGG-AAAACTTTCAAATAGAAGAGTGAAGGGTGTGGTTCA 6473  
 HUERS-P1#LTR/ 4718 AGAATAGAGGAAAAAACTTTCAAATAGAAGAGTGAATGGTGTGGTTTT 4767  
 NC\_000001.11: 6474 CTTTGGACTGTATTTGTATAAATATATTATTAGTATGTATCCAAAATTA 6523  
 HUERS-P1#LTR/ 4768 CTTTGGGCTGTATTTGTATAAATATGTTATTAGTATGTGTTCCAAAATTA 4817  
 NC\_000001.11: 6524 TGGGAACTTCTACAATGTTGATATAATTTAGTGTACATTGATAATAAT- 6572  
 HUERS-P1#LTR/ 4818 TGGGAACTCCTATAATCTGATATGATTTAGTGTACGTTATTAATAATT 4867  
 NC\_000001.11: 6573 ---ATTGTTATGTAAAA---TTGTATGCCATAGAAGTAATCAAATTCCT 6616  
 HUERS-P1#LTR/ 4868 ATAATTGTTATGTAAAAATTGTTGTATGCCACAGAAGTAACCAAATTCCT 4917  
 NC\_000001.11: 6617 AGTCAATTGTAGCTTTAATAG-GGCTTTAAAATTT 6650  
 HUERS-P1#LTR/ 4918 AGTCAATTGTAGCTTTAATAGTGGCTATAGACTTT 4952

8780 9.36 0.98 1.48 NC\_000001.11:109831234-109931057 6640 7865 (91959) HUERS-  
 P1#LTR/ERV1 5044 6263 (0) m\_b1s701i1 1

NC\_000001.11: 6640 CTTTAAAATTTGTGCTATTGGAATAGAGAAAAAAACCAAATCTTAGGAC 6689  
 HUERS-P1#LTR/ 5044 CTTTAAAATTTGTGCTATTG-----CAAATCTTAGGAC 5077

NC\_000001.11: 6690 TGTCATGGAGAGCTAATGTGTTAAACATTGCTAAACATTTTGTTCAGAG 6739  
                   v                  i                  v v                  i  
 HUERS-P1#LTR/ 5078 TCTCATGGAGAGCTGATGTGTTAAACATTGCTAATCCTTTTGTTCAGAG 5127  
 NC\_000001.11: 6740 GTCAAGGGAACCTATTTCTTTAGAGGTATTTGCAACTTTTAACAAATGAA 6789  
                   ii                  ? v                  ? i  
 HUERS-P1#LTR/ 5128 GTCAAGAAAACCTATTTCTTTNGAGCTATTTGCAACTTTTAACAANTGAG 5177  
 NC\_000001.11: 6790 TAAGATATACTCCTGAGAACAAAATTTGGAGCATATTTGTTCTCTCTAC 6839  
                   i                  v                  i  
 HUERS-P1#LTR/ 5178 TAAAATATACTCCTGTGAACAAAATTTGGAGCATATTTGTTCTCTCTAC 5227  
 NC\_000001.11: 6840 CTGATTTCTCCAGAATTTGGAAATTTTGTGAATATTCTCAATTTATGG 6889  
                   i                  i                  i i                  i  
 HUERS-P1#LTR/ 5228 CTGATTTCTCCAGAATTTGGAAACTATTTGTGAGTATTCTCAACTTATGG 5277  
 NC\_000001.11: 6890 CAGTATAGTTAATTGTGTAAGTGAATAAGAAGCTATTTCTCTGTAAAC 6939  
                   v ii                  v i                  i  
 HUERS-P1#LTR/ 5278 CAGTATAGTTATTTGCATAAGTGAATAAGAATCTGTTTTCTTTGTAAAC 5327  
 NC\_000001.11: 6940 AGAACACAGTTGGAGAACTGATTATTTACCAAGGTTTTGAATGGAATG 6989  
                   i i                  i                  i v  
 HUERS-P1#LTR/ 5328 AGGACACAATTTGGAGAACTGGTTATTTTACCAAGGCTTTGACTGGAATG 5377  
 NC\_000001.11: 6990 GCATGCTTCCTTTAAAGAATCAAAGTTGACTTATAGAGCCAATTAAGCC 7039  
                   i                  i                  v  
 HUERS-P1#LTR/ 5378 GCGTGCTTCCTTTAAGGAATCAAAGTTGACTTATAGAGCCAATAAAGCC 5427  
 NC\_000001.11: 7040 TGTTGGGGAATCTGACCTCATACTTGTCTGCACAGTGTCCCGTACAAG 7089  
                   iv i ? i                  i ? i i  
 HUERS-P1#LTR/ 5428 CCTTGGGAAANCTGGCCTCATACTTGTCTACACAGNGTCCCTGTACAGG 5477  
 NC\_000001.11: 7090 GTTCCTGACCTGTGGTAAGTAAAGGAATTTCACTTTCTAACAGGCCAGGA 7139  
                   i v  
 HUERS-P1#LTR/ 5478 GTTCCTGACCTGTGGTAAGTAAAGGAATGTCACTTTCTAACAGGCCAGGA 5527  
 NC\_000001.11: 7140 ACCCCAAGTTGTCTTGGGACCTCAAGAGGAGAGGAATTTGCCCAACTCAT 7189  
                   i i                  i  
 HUERS-P1#LTR/ 5528 GCCCCAAGTTATCTTGGGACCTCAAGAGGAGAGGAATTTACCCAACTCAT 5577  
 NC\_000001.11: 7190 AGGTATTTGTGCGTACAAACCCACAGCTGGGCTTGGCTTTTAAAAAGTCT 7239  
                   vv                  ii                  i ?  
 HUERS-P1#LTR/ 5578 AGGTATTTGAGGGTACAAACCCATGGCTGGGCTGCGCTTTNAAAAAGTCT 5627  
 NC\_000001.11: 7240 TATCTGAGATTCTTCATGGAACAGAGTTCTATCAAAGCCAATTAATAAAG 7289  
                   i                  i                  v  
 HUERS-P1#LTR/ 5628 TATCTGAGATTCTTCATGGAACAGAGTTCCATCAAAGCCAATTAATAAAG 5677  
 NC\_000001.11: 7290 TCTACATGAAAAATAATTATTTCTTGTGACTTTTTACAAATAATTAGGC 7339  
                   i ?i                  i v i i  
 HUERS-P1#LTR/ 5678 CCTANGTAAAAATAATTATTTCTTGTGACTTTATGCAATAATCAGGC 5727  
 NC\_000001.11: 7340 CAATTACAGTAAGACTAAAGTTTATTTTGTAAACGAATCAGTTCTATCAT 7389  
                   v                  i  
 HUERS-P1#LTR/ 5728 CAAGTACAGTAAGACTAAAGTTTATTTTGTAAACAAATCAGTTCTATCAT 5777  
 NC\_000001.11: 7390 GATTTGTTTTTAA-AAAAATGAAGACTGGAGAGAGAAAATTTATGCTTCA 7438  
                   - ii                  v  
 HUERS-P1#LTR/ 5778 GATTTGTTTTTAAATAAAAAATGGGGACTGGAGAGAGAAAATTTATGCTTCA 5827  
 NC\_000001.11: 7439 AAAGAAAACCTATAGTACA-CTGTTGTTAGCTATTCTTGAGTTTTTTTTC 7487  
                   -                  i - ?  
 HUERS-P1#LTR/ 5828 AAAGAAAACCTATAGTACACCTGTTGTTAGCTGTTCTTGA-GNTTTTTTTC 5876  
 NC\_000001.11: 7488 TGTAGTTTACTAAATTCCAAATCTTTGTGGGCTAGAAGTCTCAAAC 7537  
                   i i                  i i                  v i  
 HUERS-P1#LTR/ 5877 TGCAGTTTGGACTAAATCTAAATCTTTGTGGGCTACAAGTCCCAAC 5926

NC\_000001.11: 7538 TAATGCTTTCAAATCTTTGTTTTTAAAATTGGGAATTGTACTCCTCAGCC 7587  
ii i i i v  
HUERS-P1#LTR/ 5927 TAATGCTTTCAAATCTTTACTTTTTAAAAGTGGGAATTGCACTCCTTATCC 5976  
NC\_000001.11: 7588 TAGGACTCATTATTTACCTTATAATAGGCTGTTTCACTTAAACACTGTAG 7637  
? i v - ? ii v  
HUERS-P1#LTR/ 5977 TAGNACTCATTATTTACCTTATAGTACGCTG-TTCNCTTAAATGCTGTAC 6025  
NC\_000001.11: 7638 TAAAACATATAGTTGAGAGTACTAATGTTTTTGGCCATGAAAG----- 7678  
v ? i i ii v -----  
HUERS-P1#LTR/ 6026 TAAAACATATAGATGANAATACTAACGCCTTTGCCATGCAAGCCTTGGAAC 6075  
NC\_000001.11: 7679 CCCAGCCAGGCCTGCATGAGT-CACTCAGACAGTTACAAAGCAGTTCAAC 7727  
- i i i v  
HUERS-P1#LTR/ 6076 CCCAGCCAGGCCTGCATGAGTACGCTCAGACAGTTGCAAAGCGGTTCCAC 6125  
NC\_000001.11: 7728 TCTTCTCACCTTGGGATGCACTCCCATTTCCTACTACGTCCTCTGTTGGCA 7777  
i i vv ? i iii i i ii  
HUERS-P1#LTR/ 6126 TCCTCTCACCTTGGGGTCAACNCTACCCCCACTACGCCCTGTGAGCA 6175  
NC\_000001.11: 7778 GGAAGAAGCCAGAGCGATTACAACTTTTCCCATCTTCATAGCCTACAT 7827  
iv? ii ? i  
HUERS-P1#LTR/ 6176 GGAAGAAGCCAGAGCGATCGNCGGCCTTTTCCCATCTTCATAGCCNACAC 6225  
NC\_000001.11: 7828 CGTAAGACGAGGGCATTATAAAAACCCAAAGGGAAGGAT 7865  
v iv i ii i  
HUERS-P1#LTR/ 6226 CTTAAGATTAAGGTGTTATAAAAACCCAAAGGAGGGAT 6263

4851 9.63 4.06 0.14 NC\_000001.11:109831234-109931057 7866 8530 (91294)  
LTR8#LTR/ERV1 1 691 (0) c\_b1s401i2 1

NC\_000001.11: 7866 TGAAACTGCCTTTGCAATATTATGACTGAGACAGTGAAAGAGATCTAAGT 7915  
i v i i vi  
LTR8#LTR/ERV1 1 TGAAACC GCCTTTGCAAAATTATAACTGAGACAGTGAAAGAGATCTGACC 50  
NC\_000001.11: 7916 ATACTGACTCCATCTTGTTTCTAACCTCCAAGCTGTCCTTGTTAGG---CT 7962  
vv i i vvi---  
LTR8#LTR/ERV1 51 TAACCGACTCCATCTTGCTTCTAACCTCCAAGCTGTCCTTGTTTCATTCT 100  
NC\_000001.11: 7963 GGGCATAGACTGAACTAAGTTTGGGAAAAACTTAGTTTATAGTT----- 8007  
i i i ii - -----  
LTR8#LTR/ERV1 101 GGGCGTAGGCCGAACTAAGTTTGGGAGGAA-CTTAGTTTATAGTTTANAN 149  
NC\_000001.11: 8008 --TAAACAAAGATGGTAACAGCCCTTTCCCAAAGCAGGCCTCCTTCTTGC 8055  
-- i i i ii i  
LTR8#LTR/ERV1 150 TTAAACAAAGACGATAACAGCCCTTTCCCAAACAAACCCCTTCTTGC 199  
NC\_000001.11: 8056 ATGGGAAGTATGCTTTGTTAGGACTAACATTAGCTGCAAGATTAGAA 8105  
v i i ii  
LTR8#LTR/ERV1 200 CTGGGGACTAGACTGCCTTTGTTAGGACTAACATTAGCCACAAGATTAGAA 249  
NC\_000001.11: 8106 ATTATGGTTTAGGAGTCATGCAGCTGGAGGCTACAAGATTCTGAGCCTCC 8155  
v  
LTR8#LTR/ERV1 250 ATTATGGTTTAGGAGTCATGCAGCTGGAGGCTACAAGATTCTGACCCTCC 299  
NC\_000001.11: 8156 CTAAATAGCTTCCAAGATCAGAGCTTGAGATATTTGAGACCCTGCACT 8205  
i iv i i v  
LTR8#LTR/ERV1 300 CCAAAGTCTCCTAAGATCAGTGTGAGATATTTGAGACCCTGCACT 349  
NC\_000001.11: 8206 TAATGGATCAGCTGGCACCCTAAGATCAATAAAGTGGCTCATCTGATCT 8255  
i iv i  
LTR8#LTR/ERV1 350 TGATGGATCAGCTGGCACCACCAGATCGATAAAGTGGCTCATCTGATCT 399  
NC\_000001.11: 8256 TGTGACTCCACCCAGGAAGTACTCAGTGAAGAAGACAGGTCCGACTC 8305  
i i i v i  
LTR8#LTR/ERV1 400 TGTGGCCCCACCCAGGAAGTACTCAGCGCAAGAAGACAGTTCGACTC 449

```

NC_000001.11:      8306 CCTATGATTCATCTCTGACCAATCAGCACTCCTGGCTCACTGGCTT--- 8352
                                i i          ---
LTR8#LTR/ERV1     450 CCTATGATTCATCTCTGACCAATCAGCACTCCCGACTCACTGGCTTCCC 499

NC_000001.11:      8353 -----AGTTATCTTTAAAACTCTGCTCCCAAATGCTCAGGGA 8391
----- i i          v i i
LTR8#LTR/ERV1     500 CCTACCCACCAAATTATCCTTAAAACTCTGATCCCGAATGCTCGGGGA 549

NC_000001.11:      8392 GACTGATTTGAGTAATAATAAAAACTCTGGTCTCCACATAGCTGGCTCTG 8441
                                i i i i
LTR8#LTR/ERV1     550 GACTGATTTGAGTAATAATAAAAACTCCGGTCTCCCGCACAGCCGGCTCTG 599

NC_000001.11:      8442 CGTGAATTACTCTTTCTCTATTGCAATTCACCTGTCTTGATGAATCGGCT 8491
                                v i
LTR8#LTR/ERV1     600 CGTGAATTACTCTTTCTCTATTGCAATTCCCCTGTCTTGATAAATCGGCT 649

NC_000001.11:      8492 CTGTCTAGGCAGCAGGCAAAGCAA--CTTTGGGTGGTTACA 8530
                                i i ii --- v i
LTR8#LTR/ERV1     650 CTGTCTAGGCAGCGGCAAGGTGAACCCGTTGGGCGGTTACA 691

```

## B) RepeatMasker alignment between the L2 elements and the third THOLE exon.

```

332 30.64 3.20 0.78 NC_000001.11:109831234-109931057 78132 78256 (21568) C
L2c_3end#LINE/L2 (2) 476 349 m_b2s601i50 101

NC_000001.11:      78132 TCATTCAACTCAGCCATCATTAACTTGGTACCTATTATGTGCTAGGTACC 78181
                                -i i v v v i vi ii i i ii i
C L2c_3end#LINE     476 TCATTCA-TTCAACAAACATTTATTGAGCGCCTACTATGTGCCAGGCGCT 428

NC_000001.11:      78182 ATTGATCCAGAGGTGACTGAG-CATGGGTGCCACCTGGAAGAAG-TCTCG 78229
ivv v i i v i - i viv ii ivv i - v i
C L2c_3end#LINE     427 GGGGATACAAAGATGAATAAGACACGGTCCCTGCCCTCAAGGAGCTCACA 378

NC_000001.11:      78230 GTCTAG-GGTGGGGACAGA-ATGTAACCA 78256
                                - v i - ? v
C L2c_3end#LINE     377 GTCTAGTGGAGGAGACAGACANGTAAACA 349

431 31.49 3.40 2.90 NC_000001.11:109831234-109931057 78308 78513 (21311) C
L2c_3end#LINE/L2 (143) 335 129 m_b2s601i51 101

NC_000001.11:      78308 CAATGACTTATCAGAGCCAGCATTGAGGAATGAGCCAAGTCCAATGGGA 78357
i v v v v v i vv v ii v iii vii v v
C L2c_3end#LINE     335 CAAGTTAATGATAAGTGCTATAATGGGAGTATAGACAGGGTGCTATGGGA 286

NC_000001.11:      78358 ACACAGGAAAAGGACCCTTTGCTCTGCCAGGAGAGTCACAGAAGGCTTTG 78407
i iii i vv vvi vv? iv i i vi i-
C L2c_3end#LINE     285 GCACAGAGGAGGGCACCTAGACTAGNCTTGGGGGTCAGGGAAGGCTTC- 237

NC_000001.11:      78408 CTGGTGGAGGATGAGATGCAATTTAGCCTGAAATGATGAGGAGTTGTG 78457
i v - v vii vi v ? vi v v --- vv
C L2c_3end#LINE     236 CCGGAGGAGG-TGACATCTGAGCTGAGNCTTGAAGGATGAGTAG---GAG 191

NC_000001.11:      78458 ITCAGCCATGTGGAGAAAGG-----AGCATTCCAGGCAGAGGGACCAG 78500
- v iii ----- v
C L2c_3end#LINE     190 TT-AGCCAGGTGGAAGGAGGGGGAAGAGCATTCAGGCAGAGGGAACAG 142

NC_000001.11:      78501 TCTGAGCAAAGGC 78513
iv v
C L2c_3end#LINE     141 CATGTGCAAAGGC 129

```

## 4. Supplementary Figure 1

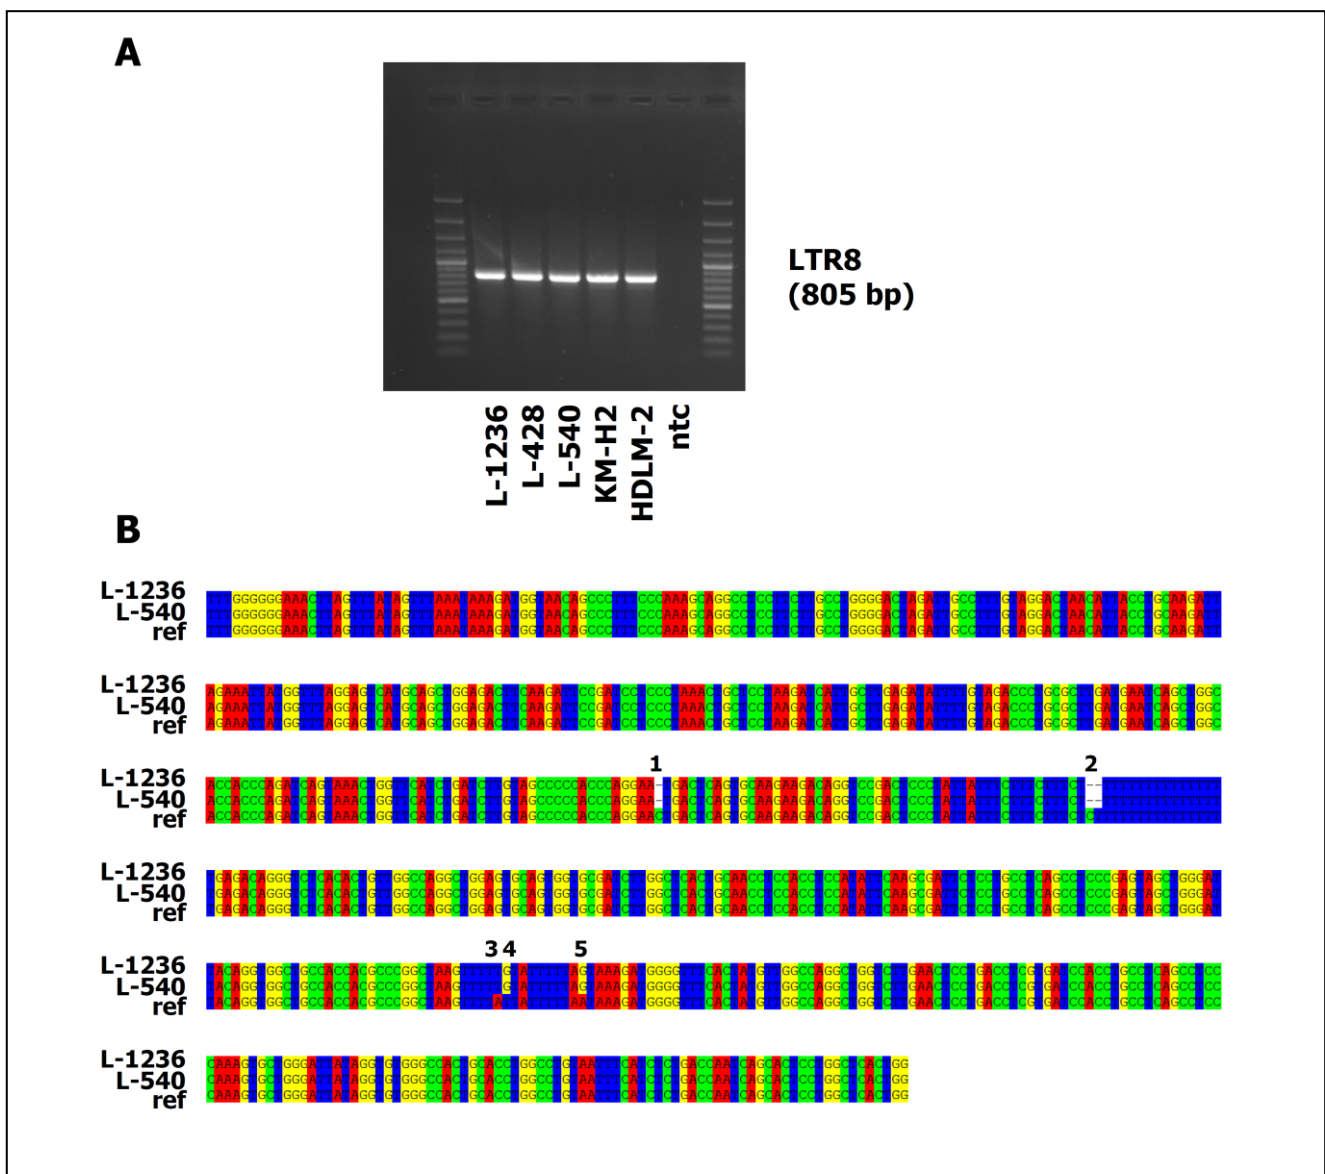

**Supplementary Figure 1. Comparison of the THOLE associated LTR8 from Hodgkin lymphoma cell lines and the reference genome sequence. A)** Genomic DNA from HL cell lines was used as template for PCR with primers specific for the THOLE-associated LTR8. **B)** PCR products were isolated and sequenced by using the same primers. Presented is an alignment between the sequences from L-1236 and L-540 cells and the genomic reference sequence (NC\_000001.11:109831421-109832103). The indicated differences between the reference sequence and the sequences from HL cell lines are known polymorphisms (1: rs35632747, allele frequency for delC=0.6626; 2: rs71580506, delCT=0.4075; 3: rs569574, T=0.6851; 4: rs557452, G=0.6833; 5: rs569544, G=0.6841; gnomAD data base, European population, 2019). The alignment was visualized with GeneDoc (<https://github.com/karl nicholas/GeneDoc>, last accessed date: 24. October 2019).

### 5. Supplementary Figure 2

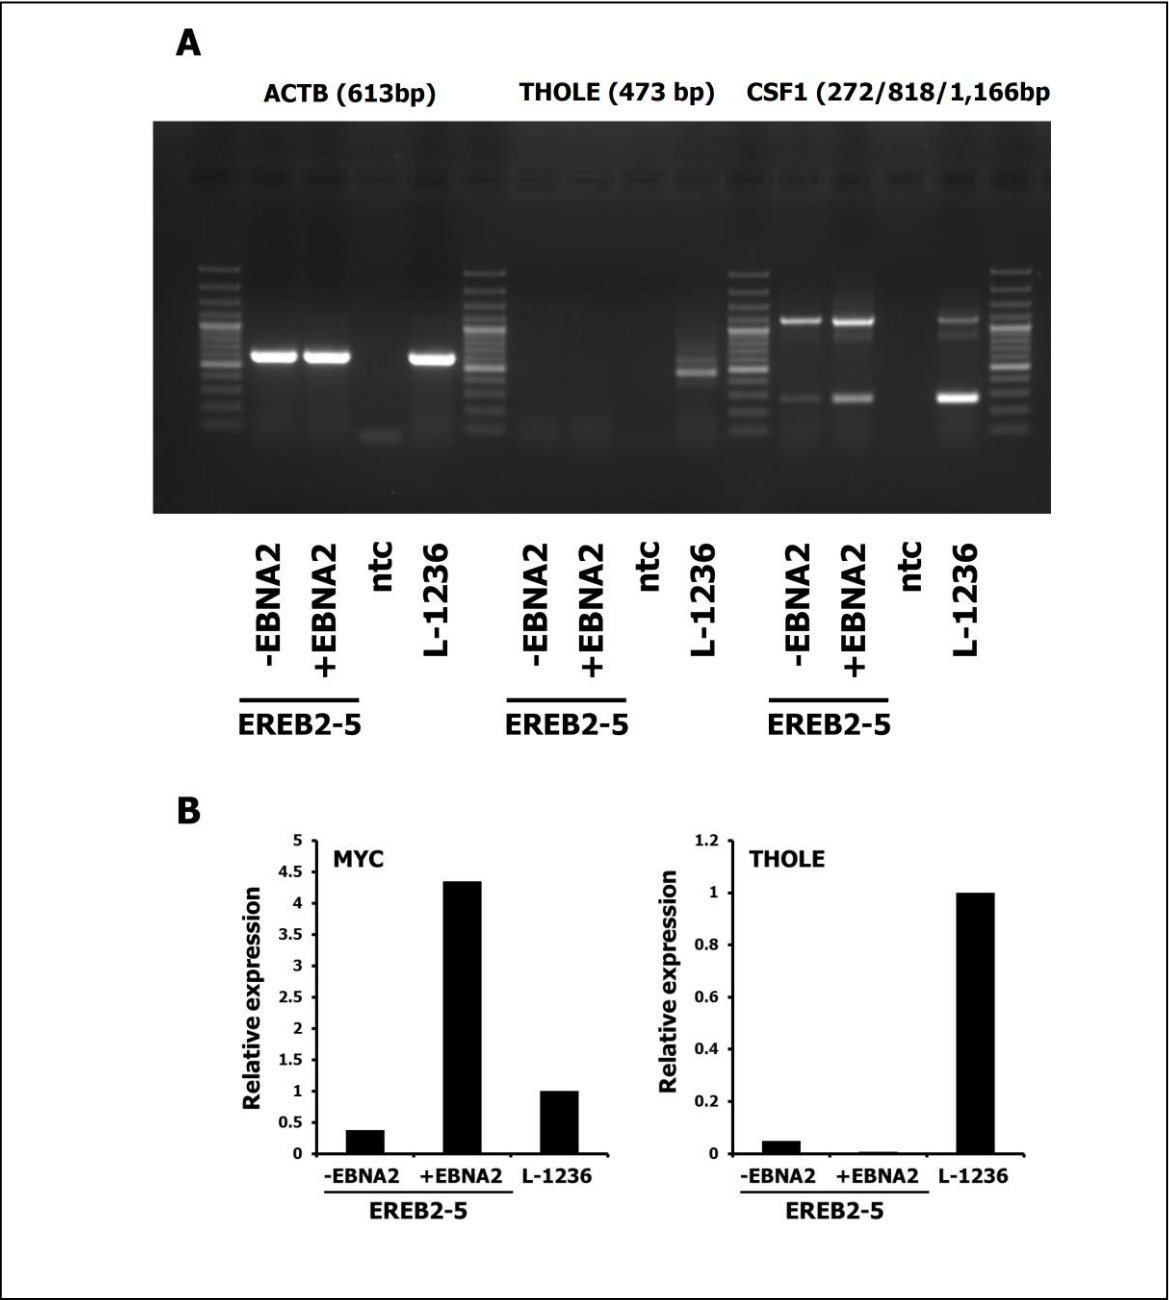

**Supplementary Figure 2. Absence of THOLE expression in EBV immortalized cells.** Presented are representative results from RT-PCR with the indicated primer combinations. cDNA from L-1236 cells as well as EREB2-5 cells was used as template for RT-PCR. EREB2-5 cells were cultured in the presence of Estrogen (+EBNA2) or in the absence of Estrogen (-EBNA2) for 4 days. Actin beta (ACTB) served as housekeeping control; ntc := no template control. **A**) Conventional PCR. For detection of CSF1 the primer combination "CSF1.V1-4.E5s+E7as" was used. The CSF1 product sizes correspond to transcript variants 3 (272 bp), 1 & 4 (1,166 bp) and 2 (818 bp). **B**) Quantitative RT-PCR. Induction of functional EBNA2 in EREB2-5 cells was proven by detection of increased MYC expression. No induction of THOLE was observed.



### 6. Supplementary Figure 3

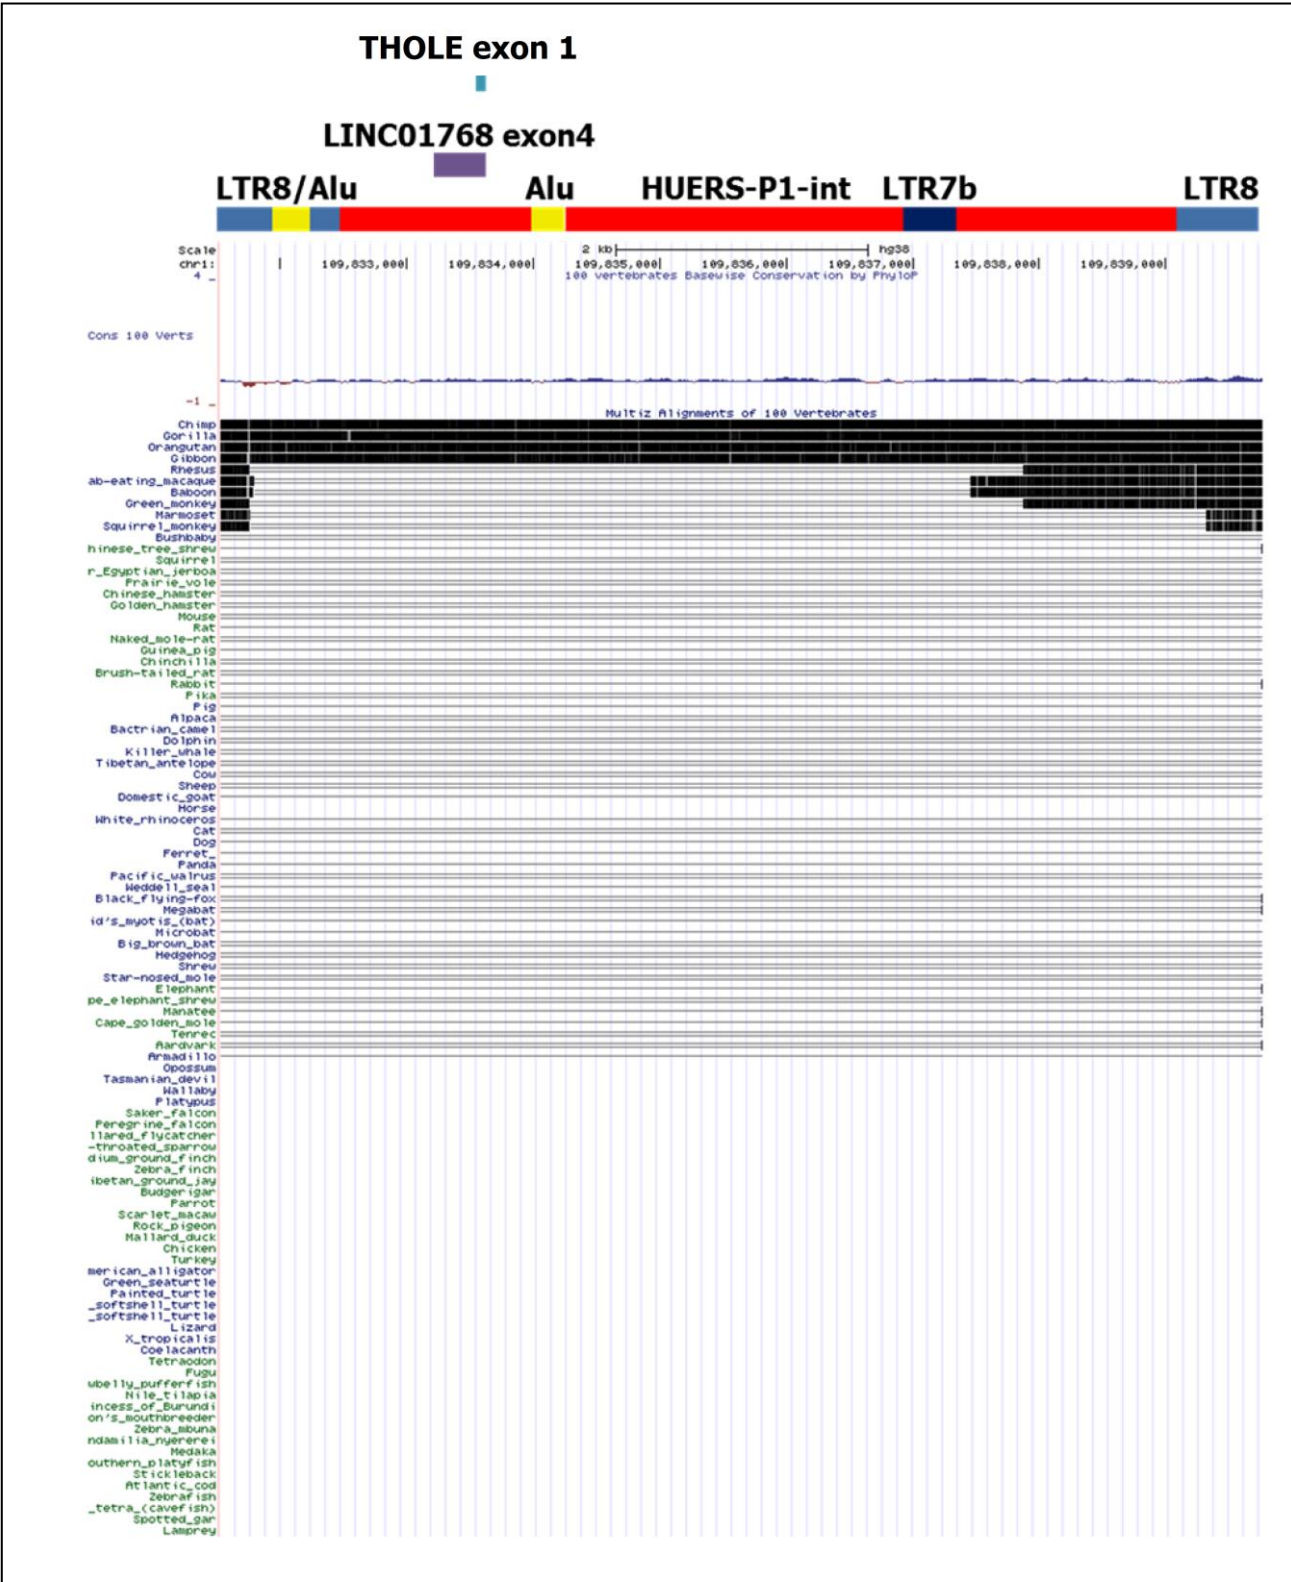

**Supplementary Figure 3. Conservation of the THOLE associated ERV in Hominoidea.** Conservation of the genomic region surrounding the first THOLE exon (human chr. 1:109,831,532-109,839,764; genome version: hg38) including the LTR8 was visualized with the UCSC genome browser (<http://genome.ucsc.edu>, last accessed date: 24. October 2019). The positions of exons and repeats are indicated.

## 6. Supplementary Figure 4

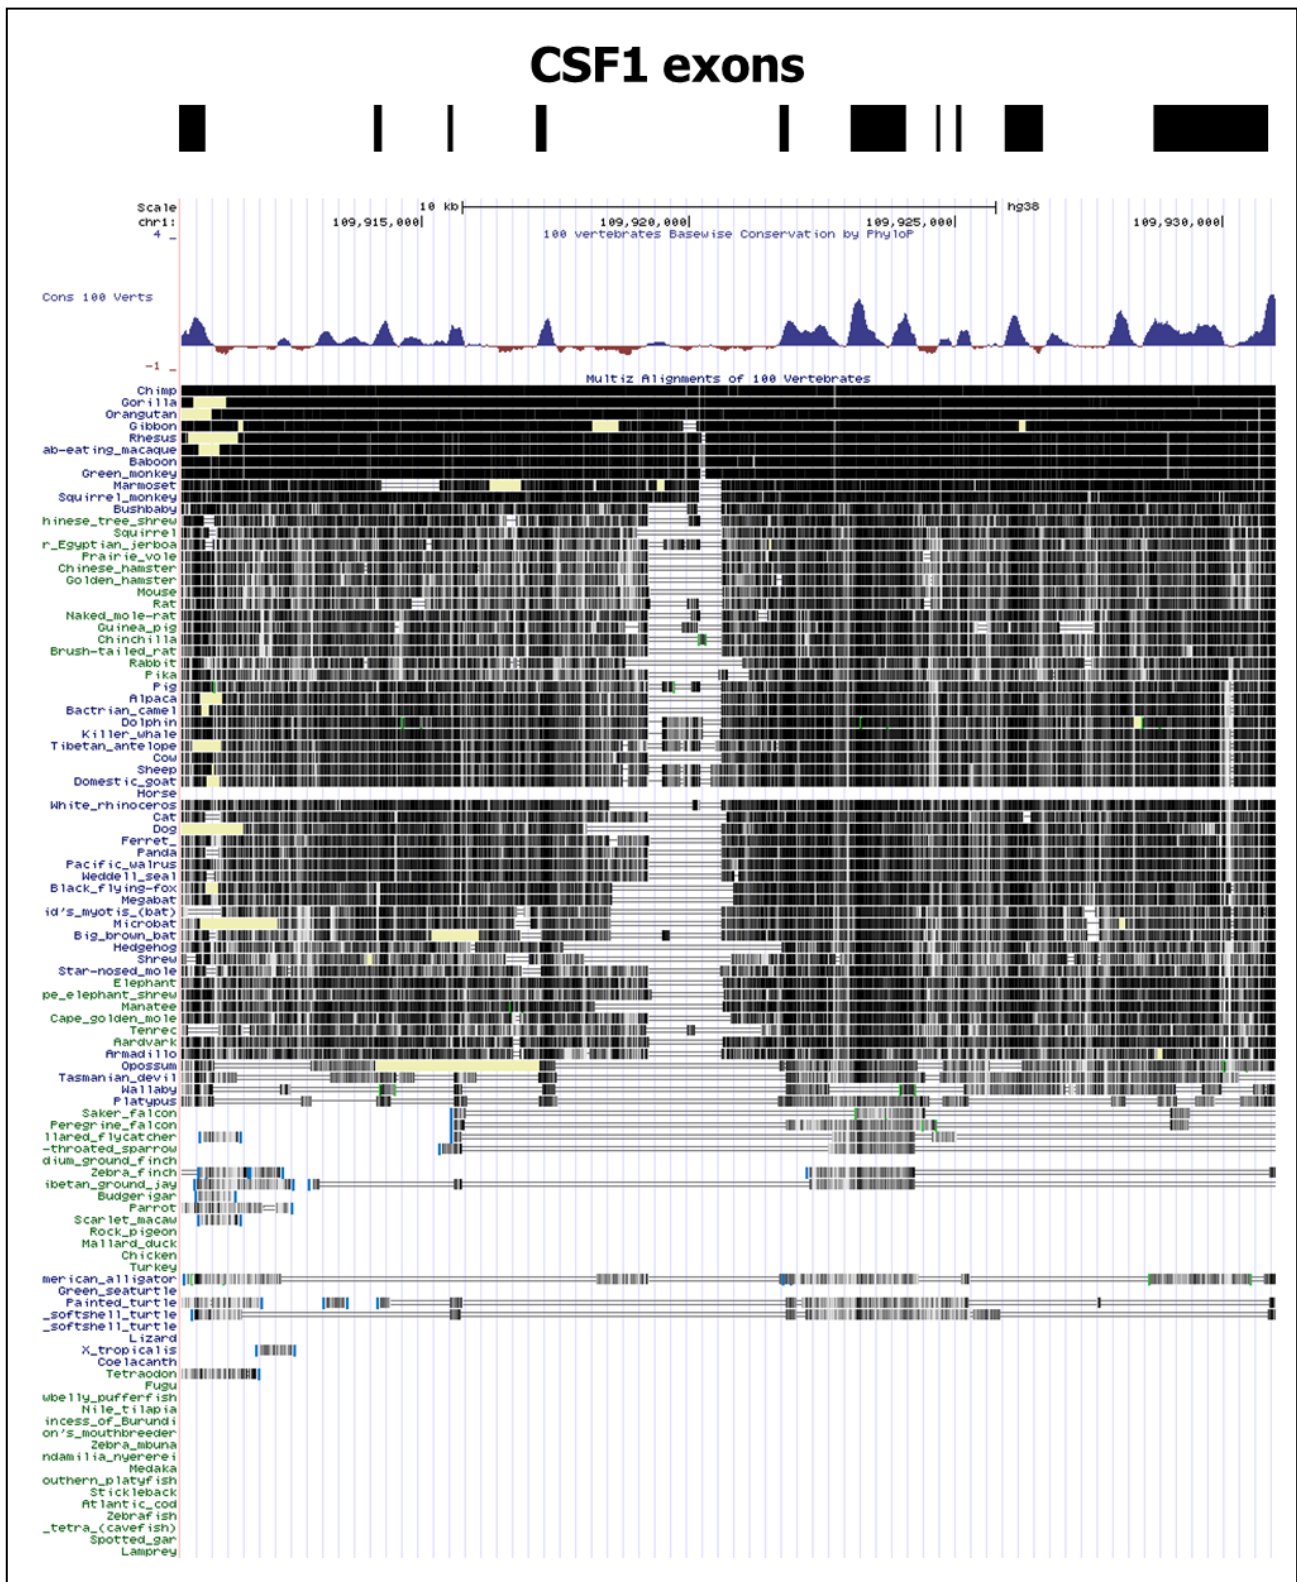

**Supplementary Figure 4. Conservation of the CSF1 locus in mammals.** Conservation of the CSF1 locus (chr. 1:109,910,506-109,930,992; genome version: hg38) was visualized with the UCSC genome browser (<http://genome.ucsc.edu>, last accessed date: 24. October 2019)). The positions of exons from CSF1 are indicated.

**8. Supplementary Figure 5**

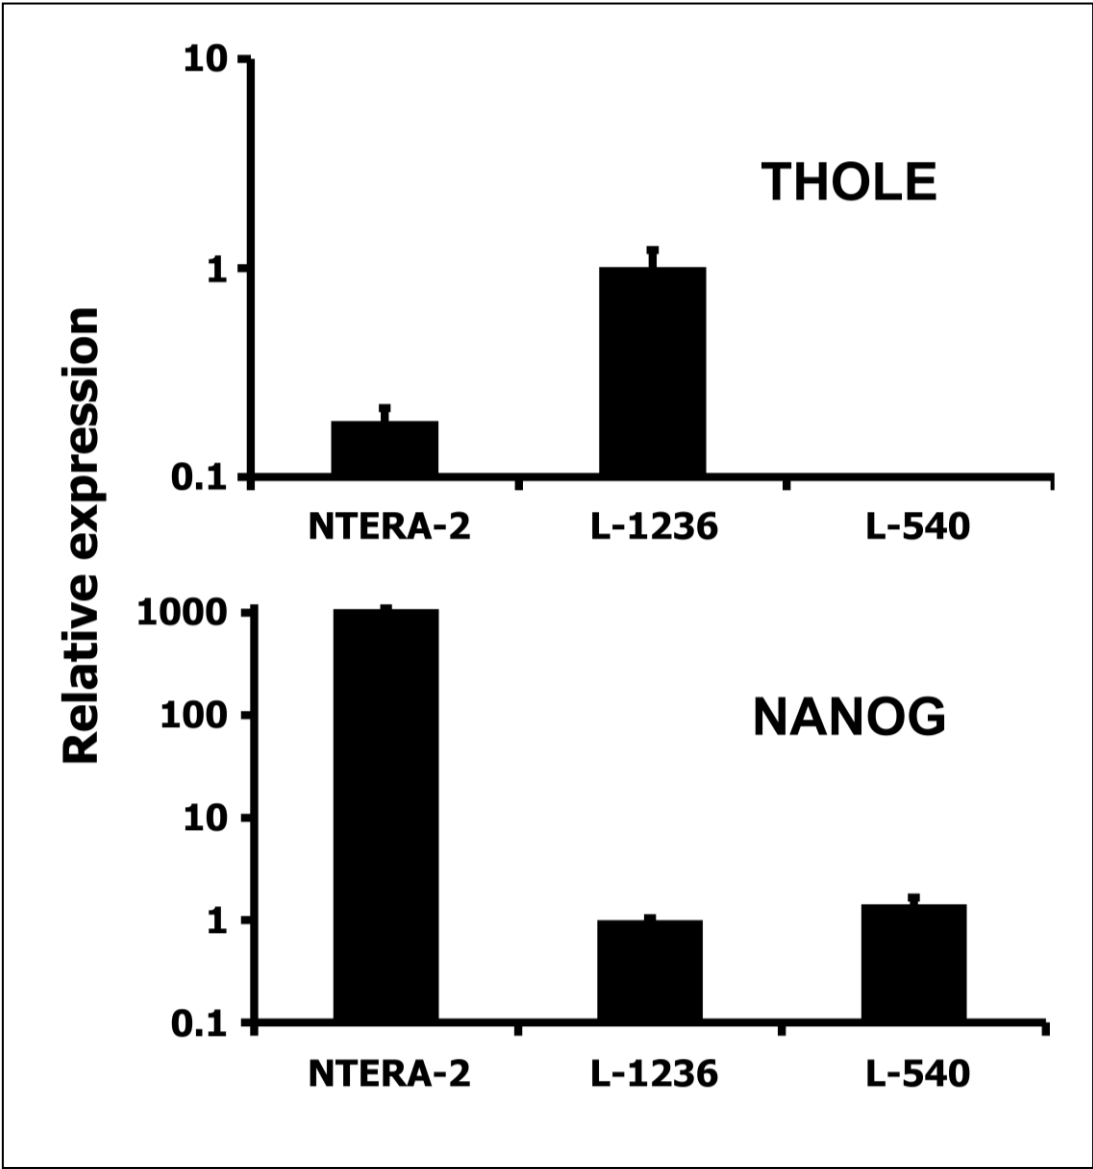

**Supplementary Figure 5. Moderate expression of THOLE in embryonic carcinoma cells NTERA-2.** Presented are qRT-PCR results with the indicated primer combinations for THOLE and NANOG. cDNA from L-1236 and L-540 HL cells as well as NTERA-2/D1 cells was used as template for qRT-PCR. Actin beta served as housekeeping control. The embryonic gene expression profile of NTERA-2 cells was proven by detection of high NANOG levels. In contrast, only weak THOLE expression was observed.

9. Supplementary Figure 6

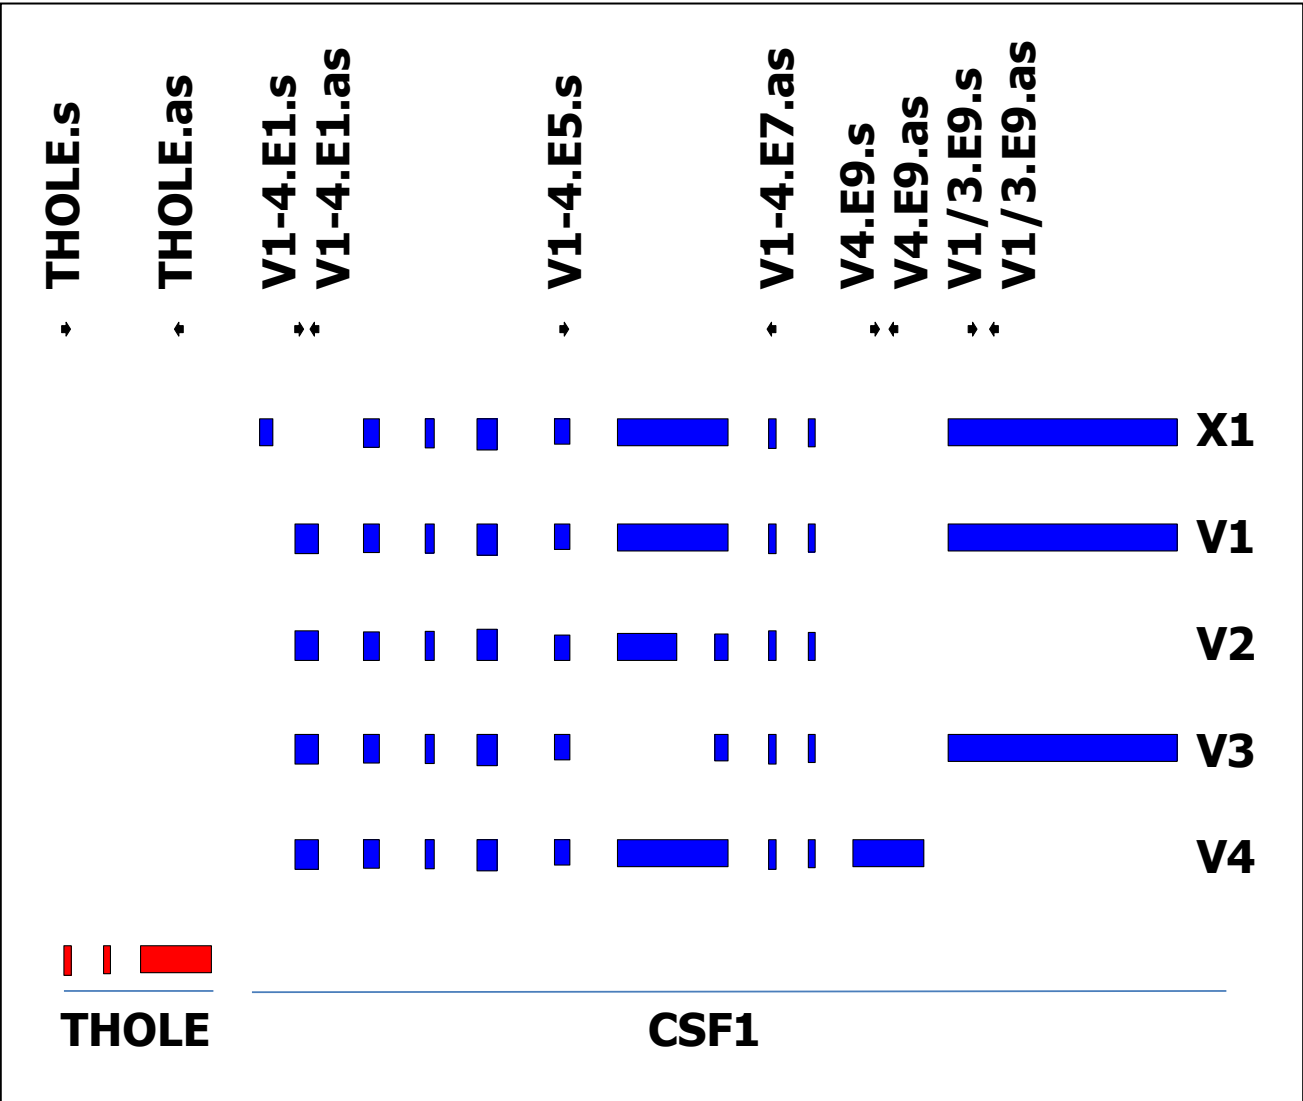

**Supplementary Figure 6. Schematic representation of the THOLE/CSF1 region with primer locations.** THOLE exons are presented as red boxes, CSF1 exons from transcript variants 1, 2, 3, 4, and X1 are presented as blue boxes. The positions of primers are indicated.
